# Supplementary material
Source: publisher site journal article supplement (https://www.dovepress.com/article/325561)
Supplement: Supplementary file 1 [file get_supplementary_file.php]

# Supplementary Figure (SF) 1. WGCNA analysis.

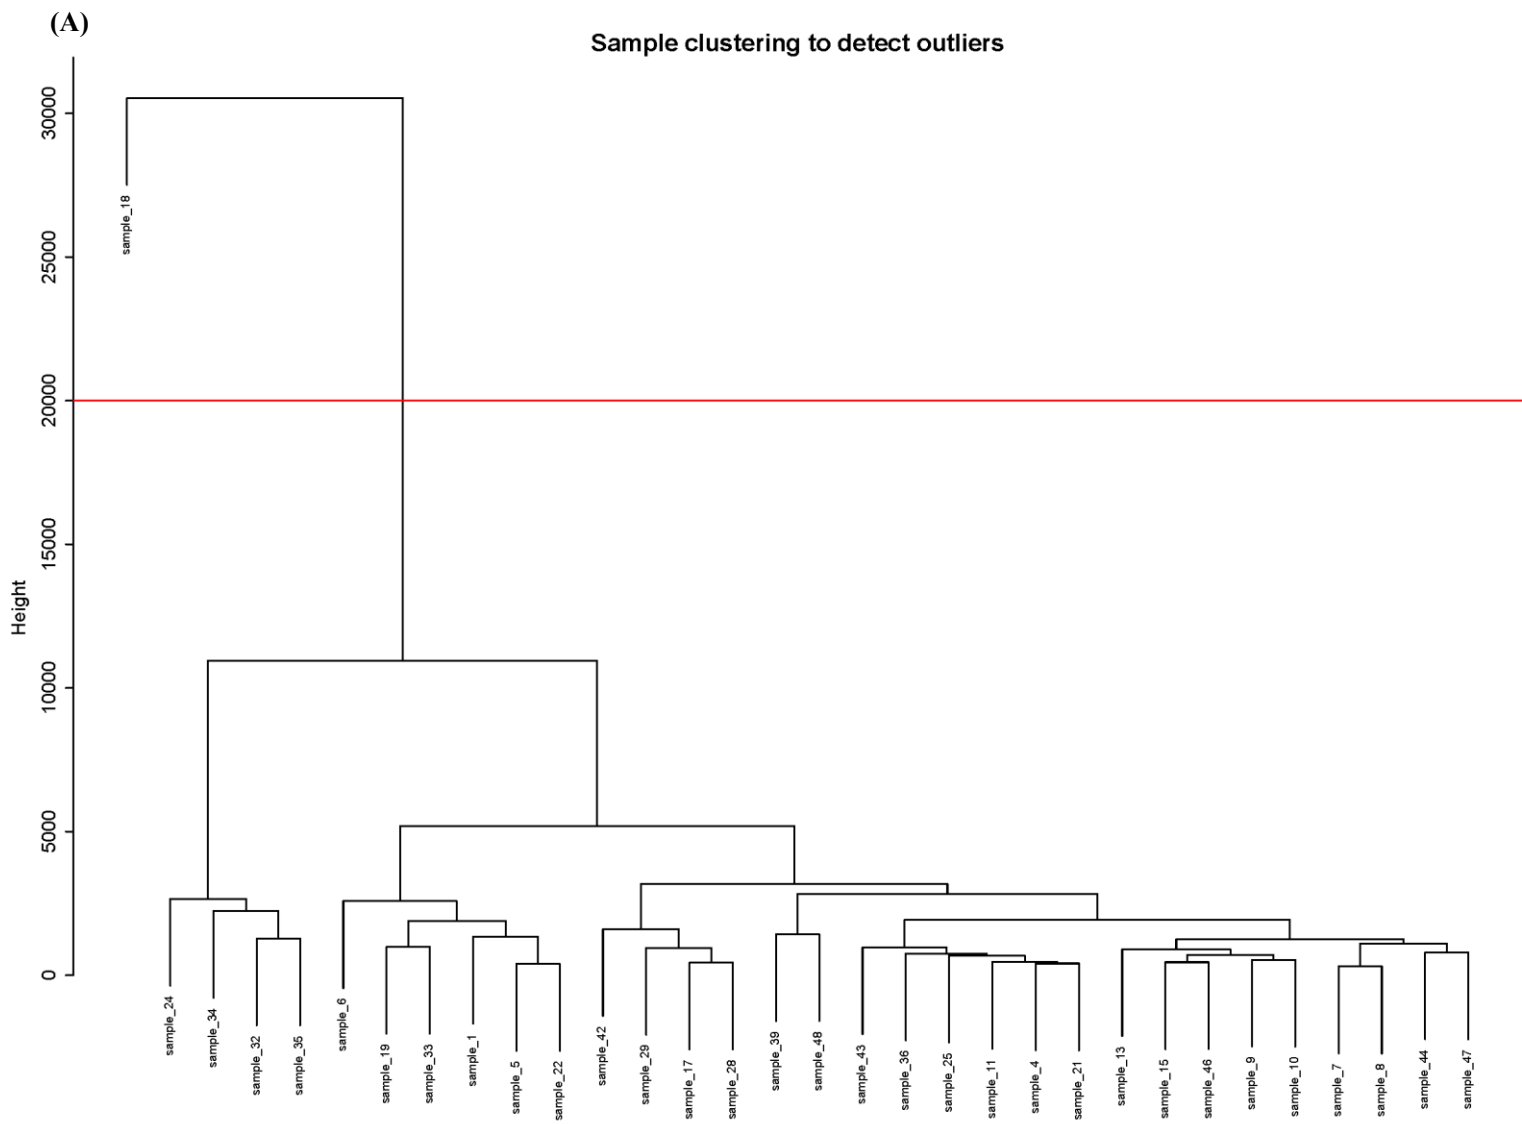

SF 1(A). Sample clustering to detect outliers. Sample 18 was detected as an outlier and removed with the cut-off value at 20000.

(B)

Sample dendrogram and trait heatmap

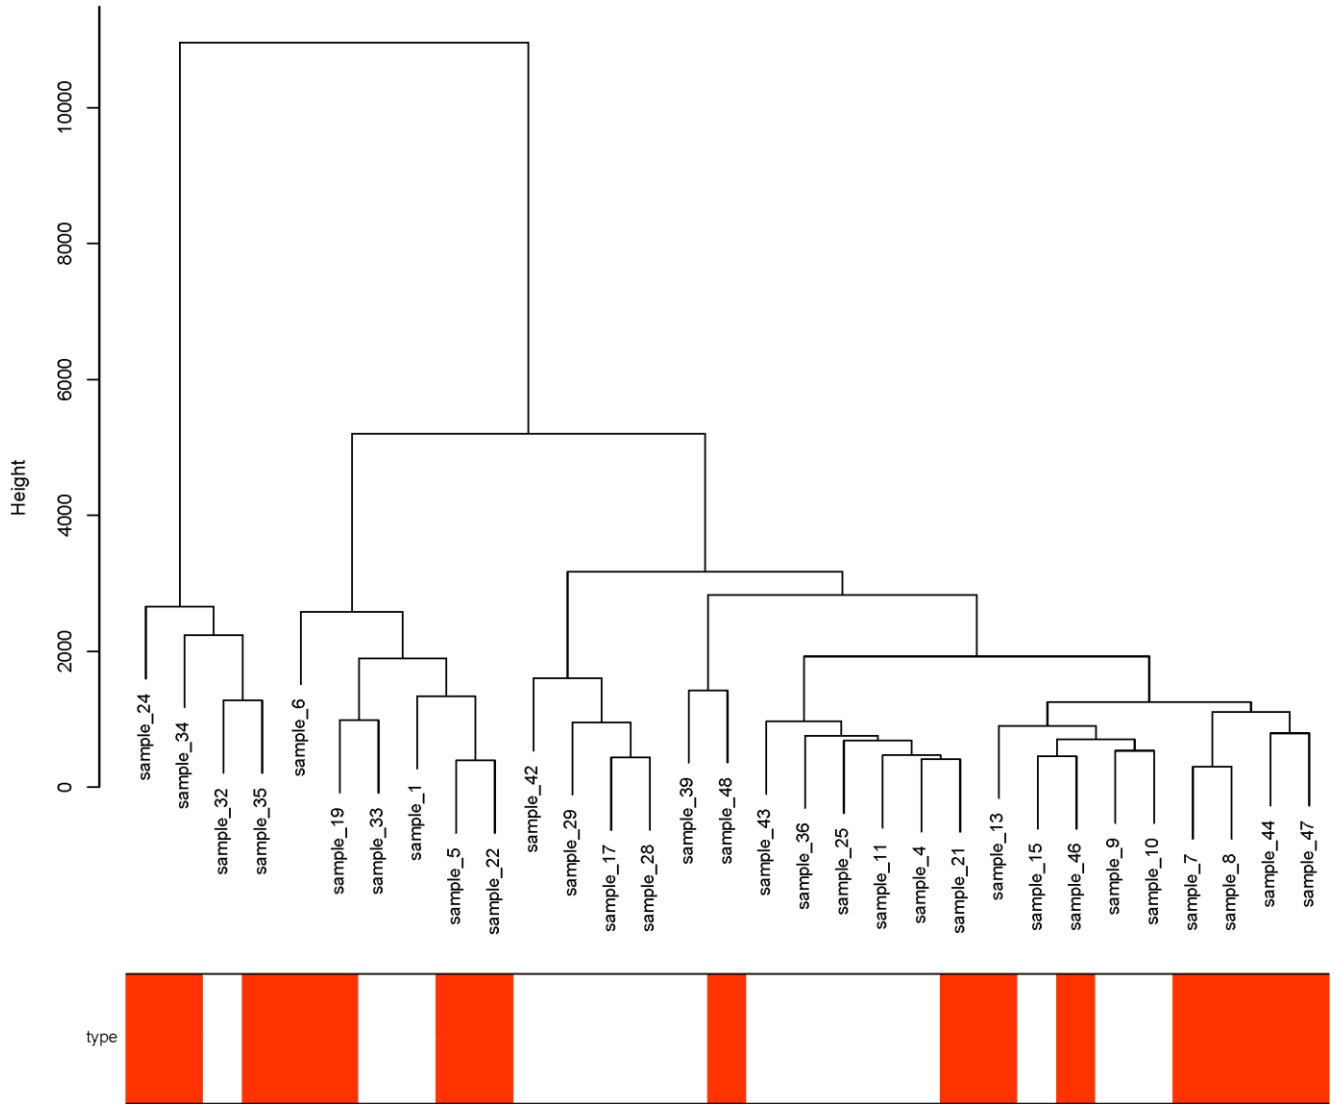

SF 1(B). Sample dendrogram and trait heatmap. The leaves of the tree correspond to MS samples and control samples. The red areas represent to MS samples while the white to control samples.

C)

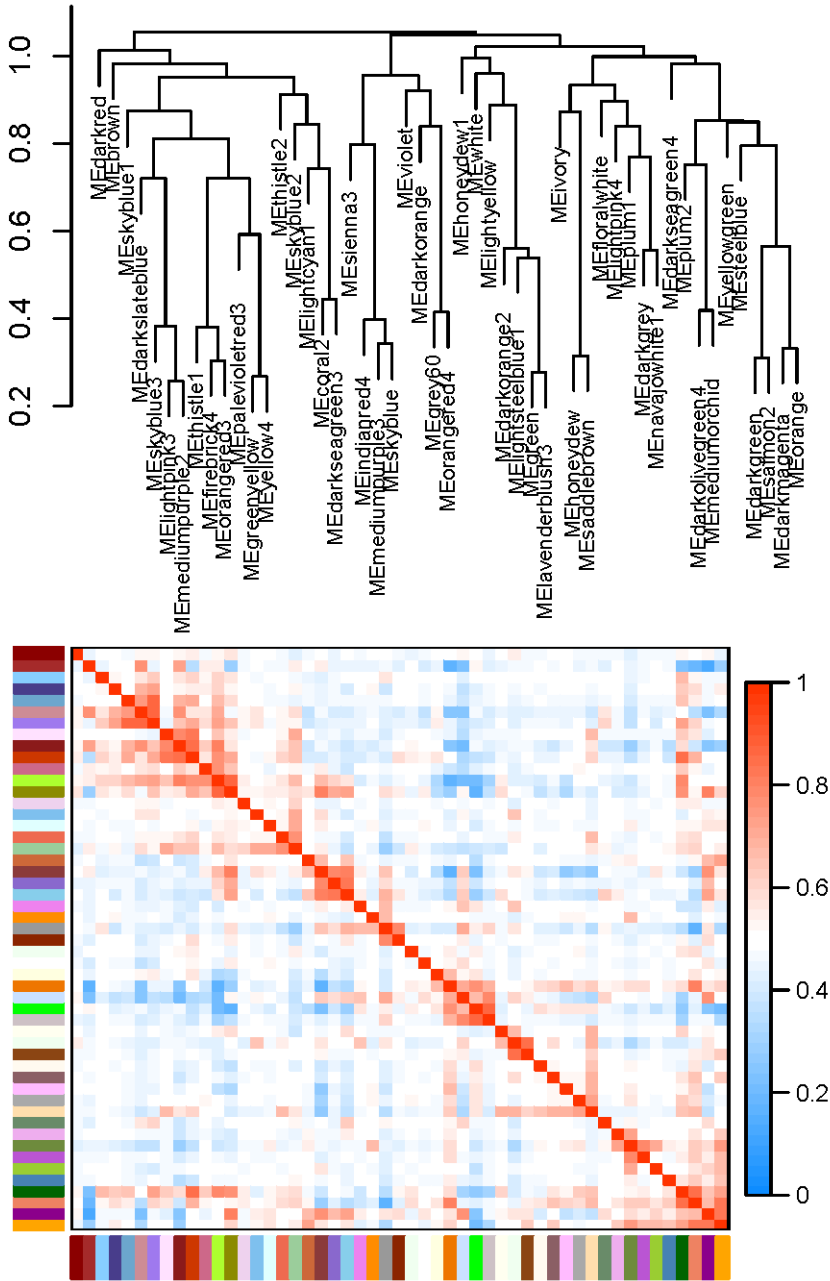

SF 1(C). Relationships among identified modules. The plot above indicates correlated hierarchical clustering of the identified modules. The plot below is correlated heatmap of eigengene adjacency. Light-blue represents low adjacency, while red represents high correlation.

## Supplementary Tables (ST)

**ST 1.** DEGs in MS dataset (GSE145412)

| Genesymbol  | logFC        | <i>P</i> value |
|-------------|--------------|----------------|
| HMGN3-AS1   | -0.008804551 | 2.33E-05       |
| CACNA1C-AS1 | -0.03332137  | 0.000146       |
| CDKN2D      | 0.325984042  | 0.000251       |
| TGFB1I1     | 0.024986706  | 0.000253       |
| FANCD2      | -0.038334181 | 0.00034        |
| ARPC1A      | 0.121592517  | 0.000345       |
| ALOX12      | 0.183792184  | 0.000396       |
| ZNF880      | -0.030685217 | 0.000424       |
| RAC1        | 0.263612995  | 0.000468       |
| ERRFI1      | -0.007823338 | 0.000492       |
| GPR17       | 0.005362952  | 0.000523       |
| TREML1      | 0.665601855  | 0.000645       |
| SELP        | 0.121651426  | 0.000653       |
| CTDSPL      | 0.117132181  | 0.000656       |
| FAM120C     | -0.013093103 | 0.000682       |
| MYL9        | 0.800942955  | 0.000695       |
| 5-Sep       | 0.235427724  | 0.000696       |
| CLEC2L      | 0.029722234  | 0.000708       |
| ZIK1        | -0.031037259 | 0.000736       |
| ANKDD1A     | 0.04863542   | 0.000757       |
| PF4         | 0.965148532  | 0.000776       |
| GP9         | 0.618232276  | 0.000802       |
| FKBP1A      | 0.25711928   | 0.000815       |
| NKX2-3      | -0.002590439 | 0.000854       |
| MBTPS1      | -0.083057619 | 0.000903       |
| DHRS13      | 0.240511299  | 0.000911       |
| ESAM        | 0.128796644  | 0.000914       |
| AHI1        | -0.021677048 | 0.000951       |
| LINC01503   | 0.115382464  | 0.000988       |
| ANO10       | 0.065283274  | 0.000999       |
| BCKDHB      | -0.031410476 | 0.001045       |
| TRIB2       | -0.196862494 | 0.001052       |
| TTC27       | -0.065129646 | 0.001086       |
| CDH15       | -0.00043614  | 0.001117       |
| CMTM5       | 0.25967567   | 0.001121       |
| ITGB5       | 0.127060853  | 0.001162       |
| ITGA2B      | 0.380128516  | 0.001165       |
| PLIN4       | 0.125338644  | 0.001193       |

|               |              |          |
|---------------|--------------|----------|
| GALNT12       | -0.059283365 | 0.001211 |
| PLIN5         | 0.103547214  | 0.001221 |
| LAMTOR1       | 0.253737113  | 0.001289 |
| F2RL3         | 0.024720712  | 0.001292 |
| ITGA9-AS1     | 0.005707636  | 0.001358 |
| CFL2          | -0.035474361 | 0.001376 |
| CXorf57       | -0.029488191 | 0.001442 |
| GFOD2         | 0.049993172  | 0.001492 |
| ANKAR         | -0.019395951 | 0.001516 |
| RNF139-AS1    | -0.010354925 | 0.001557 |
| SPARC         | 0.56062482   | 0.001578 |
| FAM214B       | 0.182067212  | 0.001635 |
| TSPAN9        | 0.055994385  | 0.00166  |
| SYTL4         | 0.010933478  | 0.001743 |
| ATPAF1        | -0.029260697 | 0.001747 |
| NAF1          | -0.0226077   | 0.001782 |
| RSPH4A        | -0.006378438 | 0.001808 |
| TPM1          | 0.066168488  | 0.001817 |
| WDR12         | -0.022324211 | 0.001831 |
| R3HDM4        | 0.486280927  | 0.001849 |
| TNNC2         | 0.072373525  | 0.001864 |
| NRGN          | 0.898293085  | 0.001864 |
| PHF10         | -0.091364941 | 0.001887 |
| FLOT2         | 0.382674103  | 0.001906 |
| PDE5A         | 0.029200624  | 0.001993 |
| PLEKHO2       | 0.324897099  | 0.002016 |
| SCGB3A2       | 0.050527249  | 0.002017 |
| RP11-363N22.2 | -0.005593842 | 0.002043 |
| ZNF717        | -0.01686815  | 0.002056 |
| FBXO36        | -0.007276382 | 0.002064 |
| SLPI          | 0.53380988   | 0.002076 |
| S100A11       | 0.535373772  | 0.00208  |
| FGR           | 0.205395717  | 0.002115 |
| SLC41A2       | -0.00672919  | 0.00212  |
| MFSD4B        | -0.019008506 | 0.002121 |
| SH3D19        | -0.00270057  | 0.002134 |
| ZBTB10        | -0.019753337 | 0.002135 |
| SLC12A9       | 0.233954399  | 0.002157 |
| CLU           | 0.398283375  | 0.002164 |
| ST3GAL4       | 0.154861656  | 0.002215 |
| HRASLS        | 0.029324637  | 0.002216 |
| USB1          | 0.17407536   | 0.002283 |
| MTURN         | 0.157616397  | 0.002312 |

|                |              |          |
|----------------|--------------|----------|
| ZADH2          | -0.074806032 | 0.00232  |
| FLOT1          | 0.178934598  | 0.002379 |
| DUS4L          | -0.015654205 | 0.00238  |
| ADGRF3         | -0.003216728 | 0.002407 |
| CYTH4          | 0.27329586   | 0.002409 |
| EFHD2          | 0.288327716  | 0.002421 |
| PTGS1          | 0.331642173  | 0.002473 |
| SETDB2         | -0.059554687 | 0.002495 |
| SNORD53        | -0.037580626 | 0.002565 |
| PNPT1          | -0.085096195 | 0.002565 |
| RP11-1007O24.3 | -0.008997673 | 0.002603 |
| CERS3          | -0.004782093 | 0.002622 |
| AC005076.5     | 0.01766387   | 0.002643 |
| HERC2P9        | -0.020297944 | 0.002653 |
| OAZ1           | 0.401399081  | 0.002763 |
| SNORD59A       | -0.087406641 | 0.002806 |
| TMEM8A         | 0.233184758  | 0.00283  |
| CSTF3          | -0.029953574 | 0.002871 |
| ACAD11         | -0.010880627 | 0.002896 |
| HSPA4L         | 0.000744942  | 0.00293  |
| ARPC1B         | 0.28546381   | 0.002954 |
| ERCC5          | -0.054160047 | 0.002975 |
| AC129492.6     | -0.029397805 | 0.003015 |
| GLT1D1         | 0.286719962  | 0.003057 |
| MGLL           | 0.090983784  | 0.003079 |
| MPHOSPH9       | -0.047930718 | 0.003113 |
| TFEB           | 0.198333419  | 0.003134 |
| ZNF385D        | 0.004553528  | 0.003153 |
| LINC01151      | 0.0280293    | 0.003162 |
| GNAZ           | 0.147049202  | 0.003218 |
| PROS1          | 0.045124679  | 0.003226 |
| OFD1           | -0.103289698 | 0.003236 |
| MYBPC3         | 0.088963853  | 0.003291 |
| THUMPD2        | -0.039870215 | 0.003312 |
| RINT1          | -0.066504131 | 0.003316 |
| CHMP4B         | 0.231395446  | 0.003344 |
| RP11-7F17.5    | 0.007894234  | 0.003349 |
| POU2F3         | -0.000433896 | 0.003473 |
| FRAT1          | 0.296495441  | 0.003477 |
| MYO1B          | -0.003924011 | 0.003525 |
| TDRP           | 0.020377424  | 0.003543 |
| P2RY10         | -0.213808693 | 0.003606 |
| ANK3           | -0.018146208 | 0.003675 |

|            |              |          |
|------------|--------------|----------|
| MSRB1      | 0.44240316   | 0.003678 |
| PI3        | 0.847972279  | 0.003741 |
| CDA        | 0.537007291  | 0.003758 |
| DOK4       | 0.047935614  | 0.003774 |
| DOCK6      | 0.005043103  | 0.003828 |
| CTTN       | 0.118190973  | 0.003846 |
| PCBP2      | 0.128060543  | 0.003848 |
| GAS2L1     | 0.144354324  | 0.00385  |
| FPR3       | -0.054009671 | 0.003879 |
| ICOS       | -0.134035962 | 0.003944 |
| CLDN5      | 0.073504837  | 0.003968 |
| PPBP       | 0.930632123  | 0.003982 |
| GNB2       | 0.29048488   | 0.004027 |
| YIPF7      | -0.001283313 | 0.004057 |
| IMPDH1     | 0.305411617  | 0.00407  |
| GP6        | 0.068219569  | 0.004092 |
| CASC15     | 0.001564589  | 0.004098 |
| AIMP1      | -0.108699788 | 0.004099 |
| TPD52L2    | 0.194105511  | 0.004139 |
| CCND2      | -0.080869938 | 0.004163 |
| VMAC       | -0.079585599 | 0.004165 |
| SLC2A10    | -0.002140081 | 0.004205 |
| SLFN13     | -0.076358445 | 0.004229 |
| TUBA1A     | 0.383838902  | 0.004245 |
| NEPRO      | -0.044020078 | 0.004255 |
| SCN1B      | 0.075732684  | 0.004331 |
| B9D2       | 0.179293572  | 0.004331 |
| PIK3CD-AS1 | 0.036762875  | 0.004364 |
| SERPINA1   | 0.408417376  | 0.004378 |
| CABP5      | 0.081303868  | 0.004432 |
| ZBTB5      | -0.061031001 | 0.004446 |
| SAMD14     | 0.039877453  | 0.004457 |
| ZNF720     | -0.020617998 | 0.004469 |
| PTCRA      | 0.301708003  | 0.004501 |
| CDH4       | 0.002980995  | 0.004562 |
| PLIN3      | 0.238801286  | 0.004593 |
| FAM134A    | 0.159793156  | 0.004642 |
| ZBTB25     | -0.059292368 | 0.004644 |
| RABIF      | 0.056668818  | 0.004665 |
| IFITM2     | 0.556245547  | 0.004696 |
| MICU3      | -0.013124602 | 0.004706 |
| TBCK       | -0.020652112 | 0.004728 |
| OGFR-AS1   | -0.009315242 | 0.004871 |

|            |              |          |
|------------|--------------|----------|
| CCDC168    | -0.000779266 | 0.004886 |
| PTPRN      | 0.006754485  | 0.004911 |
| TANGO2     | 0.175700169  | 0.004942 |
| ZNF467     | 0.33572776   | 0.004953 |
| CAMKV      | 0.000671939  | 0.004982 |
| PRR13      | 0.210192161  | 0.005015 |
| FRK        | -0.000447328 | 0.005028 |
| PCSK6      | 0.062440904  | 0.005041 |
| ZNF585B    | -0.026225762 | 0.005086 |
| CBY3       | -0.006237301 | 0.005095 |
| TOMM5      | -0.012545167 | 0.005149 |
| FAM160A2   | 0.088386643  | 0.005183 |
| PRDX6      | 0.29891882   | 0.005193 |
| SUPT7L     | -0.082306454 | 0.005198 |
| YIPF1      | 0.183571646  | 0.005206 |
| TRMT12     | -0.066964992 | 0.00528  |
| ABLIM3     | 0.117081987  | 0.005324 |
| LRG1       | 0.353187477  | 0.005328 |
| QSOX2      | -0.073128906 | 0.00542  |
| C6orf25    | 0.083221987  | 0.005428 |
| PHC2       | 0.349700697  | 0.005436 |
| SUCLG2     | -0.118575384 | 0.005455 |
| RHOG       | 0.392489214  | 0.005478 |
| NDUFAF6    | -0.01659808  | 0.005534 |
| ZNHIT6     | -0.045306408 | 0.005569 |
| CYSTM1     | 0.318800544  | 0.005587 |
| CFAP161    | 0.050884805  | 0.005616 |
| AC025171.1 | -0.039396134 | 0.005617 |
| PCBP3      | 0.02032378   | 0.005646 |
| SIGLEC5    | 0.222647294  | 0.005725 |
| HIST1H2BK  | 0.438819851  | 0.005739 |
| TYW1       | -0.04973174  | 0.005791 |
| MIR181B2   | -0.017866411 | 0.005827 |
| DHX34      | 0.214326851  | 0.005861 |
| PHEX       | -0.008408021 | 0.005881 |
| ACSBG1     | 0.00818074   | 0.005946 |
| EEF2K      | -0.047745743 | 0.005958 |
| ILK        | 0.204346762  | 0.005966 |
| HNRNPDL    | -0.165905978 | 0.005974 |
| AQP10      | 0.072835443  | 0.005986 |
| NEU1       | 0.015790052  | 0.006018 |
| 2-Mar      | 0.430661155  | 0.00603  |
| ELOVL7     | 0.047813126  | 0.006033 |



|               |              |          |
|---------------|--------------|----------|
| CDHR2         | -0.006353503 | 0.006339 |
| TMEM240       | 0.016069742  | 0.006343 |
| C5orf64       | -0.00296508  | 0.006389 |
| RASA4B        | 0.002013711  | 0.006397 |
| TARSL2        | -0.058029504 | 0.006398 |
| CTD-2201E18.3 | -0.021809182 | 0.006419 |
| AL133493.2    | -0.006666503 | 0.006471 |
| FERMT3        | 0.242488679  | 0.006474 |
| PDGFA         | 0.008033929  | 0.006474 |
| DEDD          | 0.0972635    | 0.006528 |
| LTBR          | 0.156456031  | 0.006537 |
| EHBP1L1       | 0.217006962  | 0.006541 |
| ZYX           | 0.429488943  | 0.006547 |
| FAM227B       | -0.006407747 | 0.006555 |
| MCEMP1        | 0.225451405  | 0.006557 |
| RAD9B         | -0.010006152 | 0.006582 |
| TUBA4A        | 0.307639666  | 0.006624 |
| ORC6          | -0.009730223 | 0.006671 |
| SCHIP1        | -0.00057559  | 0.006684 |
| DYNC2LI1      | -0.013534246 | 0.006689 |
| GLTP          | 0.103650384  | 0.006708 |
| KLF8          | -0.02233887  | 0.006708 |
| ENOSF1        | -0.054851745 | 0.006742 |
| C5orf34       | -0.013511118 | 0.006766 |
| DPPA4         | -0.008301542 | 0.006774 |
| FAM212B-AS1   | 0.027178589  | 0.006835 |
| TST           | 0.182238869  | 0.006846 |
| PTCD3         | -0.055842156 | 0.006853 |
| PDZK1IP1      | 0.652581139  | 0.006864 |
| RP11-588G21.2 | 0.001138467  | 0.006881 |
| SLC4A8        | -0.009443178 | 0.007036 |
| TP53I11       | 0.248835934  | 0.00704  |
| DOPEY1        | -0.056143902 | 0.007044 |
| RP11-715J22.4 | -0.01087143  | 0.007095 |
| RNF208        | 0.090535539  | 0.00711  |
| SMOC1         | -0.006587092 | 0.007115 |
| CCNJL         | 0.248574478  | 0.007189 |
| POTEF         | 0.001454722  | 0.007204 |
| AGPAT1        | 0.068333911  | 0.007213 |
| CENPJ         | -0.022512285 | 0.007228 |
| HN1           | 0.259587286  | 0.007253 |
| RGS6          | 0.032011479  | 0.007269 |
| NQO2          | 0.362959966  | 0.007297 |

|           |              |          |
|-----------|--------------|----------|
| RFC2      | 0.088614711  | 0.007337 |
| RTFDC1    | 0.165710449  | 0.007373 |
| TRIM14    | -0.132704771 | 0.007447 |
| BID       | 0.199630097  | 0.007453 |
| HCK       | 0.283043427  | 0.007498 |
| RPAIN     | -0.059351593 | 0.007502 |
| AMMECR1   | -0.029513108 | 0.007512 |
| TUBA8     | 0.007645118  | 0.007521 |
| HELQ      | -0.06258204  | 0.007522 |
| ORC2      | -0.053880597 | 0.007525 |
| FUT7      | 0.274379153  | 0.007538 |
| ZNF70     | -0.02264525  | 0.007556 |
| ZSCAN12   | -0.036698488 | 0.007566 |
| MBNL1-AS1 | 0.007923023  | 0.007571 |
| CERS2     | 0.154211929  | 0.007579 |
| OSTF1     | 0.187003015  | 0.007584 |
| RGS19     | 0.234103206  | 0.007595 |
| CD209     | -0.009677614 | 0.007598 |
| YIPF3     | 0.209680301  | 0.007708 |
| METTL8    | -0.021912504 | 0.007734 |
| THOC1     | -0.034034733 | 0.007767 |
| ASF1B     | 0.143389764  | 0.007793 |
| ZBTB47    | 0.064774356  | 0.0078   |
| TRMT6     | -0.066229281 | 0.007874 |
| FAM84B    | -0.060519677 | 0.007914 |
| DNAAF2    | -0.037507212 | 0.007952 |
| SPI1      | 0.377306692  | 0.007984 |
| CFAP36    | -0.072862383 | 0.008006 |
| HMG20A    | -0.052936889 | 0.008009 |
| SLC25A44  | 0.167547189  | 0.008071 |
| SEMA6B    | 0.010491853  | 0.008095 |
| RNASEH1   | -0.045703863 | 0.008128 |
| TSTD2     | -0.038488881 | 0.008142 |
| OAZ2      | 0.185641699  | 0.008163 |
| DIDO1     | -0.066059472 | 0.008183 |
| ZNF84     | -0.052634766 | 0.008204 |
| ARRB2     | 0.278147784  | 0.008204 |
| POR       | 0.108261038  | 0.008243 |
| AKAP7     | -0.045525501 | 0.008269 |
| CRLF2     | -0.005850132 | 0.00842  |
| TMEM30B   | -0.01236534  | 0.008427 |
| DYRK2     | -0.128876861 | 0.008429 |
| SHPRH     | -0.026873431 | 0.008442 |

|              |              |          |
|--------------|--------------|----------|
| CHEK2        | -0.018660221 | 0.008466 |
| KIAA1524     | -0.018421879 | 0.00852  |
| FCGRT        | 0.312339978  | 0.008554 |
| XPO4         | -0.04828162  | 0.008589 |
| UACA         | -0.005893066 | 0.008633 |
| HTATIP2      | 0.114689395  | 0.008633 |
| COX11        | -0.040099578 | 0.00864  |
| HYAL2        | 0.031102543  | 0.008652 |
| ZNF224       | -0.092220683 | 0.008661 |
| MLX          | 0.103246194  | 0.008671 |
| CEACAM3      | 0.296189942  | 0.008677 |
| ORAOV1       | -0.028477559 | 0.008741 |
| RTN2         | 0.093114614  | 0.008749 |
| ATOH7        | -0.001383518 | 0.008771 |
| COL24A1      | -0.003945276 | 0.008781 |
| ZKSCAN3      | -0.024388118 | 0.008789 |
| NT5DC1       | -0.036717578 | 0.008794 |
| CUL1         | -0.098262028 | 0.008797 |
| USP40        | -0.021562076 | 0.008804 |
| PDCD7        | -0.045206392 | 0.008815 |
| NINJ2        | 0.189900187  | 0.00884  |
| GNG5         | 0.302251838  | 0.00884  |
| SH3BGRL2     | 0.14851427   | 0.008861 |
| CAP1         | 0.20276471   | 0.008874 |
| FAM122C      | -0.011326937 | 0.008948 |
| ZNF331       | -0.028834457 | 0.008969 |
| EGFL7        | 0.07197876   | 0.008974 |
| ZDHHC23      | -0.020022267 | 0.008978 |
| RP1-167G20.1 | 0.001442807  | 0.009085 |
| ZNF555       | -0.012941399 | 0.009107 |
| SLC39A1      | 0.128498461  | 0.009118 |
| PPM1M        | 0.206660572  | 0.009142 |
| FMNL3        | -0.045477214 | 0.009181 |
| CCDC138      | -0.009242919 | 0.009193 |
| ARMCX2       | -0.021472535 | 0.009236 |
| MCM3AP-AS1   | -0.008510789 | 0.009288 |
| BRIP1        | -0.005281078 | 0.009293 |
| MSL3P1       | -0.025423646 | 0.009304 |
| SH3TC2       | 0.006045383  | 0.009304 |
| TNIP1        | 0.26496553   | 0.009318 |
| ACRBP        | 0.277241797  | 0.009346 |
| TRAF5        | -0.084994696 | 0.009357 |
| ZFYVE21      | 0.020799347  | 0.009372 |

|             |              |          |
|-------------|--------------|----------|
| CANT1       | 0.192368298  | 0.009379 |
| TSNARE1     | -0.054293521 | 0.009404 |
| ZNF596      | -0.01636648  | 0.009414 |
| UTP3        | -0.085439391 | 0.009427 |
| VIL1        | 0.028049111  | 0.009428 |
| RBM19       | -0.047986969 | 0.009431 |
| MIR646      | -0.096748893 | 0.009452 |
| MRVI1       | 0.202418724  | 0.009528 |
| TUBA1C      | 0.104202604  | 0.009546 |
| LINC01619   | -0.018838183 | 0.009555 |
| LINS1       | -0.054007543 | 0.009563 |
| TBC1D31     | -0.022973508 | 0.009626 |
| AJAP1       | -0.005108388 | 0.009636 |
| RBL1        | -0.036559028 | 0.00964  |
| OXCT1       | -0.076085727 | 0.00965  |
| LY6G6F      | 0.006510521  | 0.009665 |
| C3orf52     | 0.002396789  | 0.009676 |
| TFE3        | 0.203830247  | 0.009682 |
| ST3GAL6-AS1 | 0.011797057  | 0.009685 |
| ZNF662      | -0.009856503 | 0.009692 |
| GUSBP1      | -0.01499049  | 0.009776 |
| GPR137C     | -0.000987295 | 0.009784 |
| ZFP3        | -0.049409197 | 0.009797 |
| PP7080      | -0.046579376 | 0.009829 |
| INTS6L      | -0.092171603 | 0.009841 |
| ZNF17       | -0.033396931 | 0.00988  |
| ITGB3       | 0.133346759  | 0.009892 |
| ARHGAP11B   | -0.006880307 | 0.009907 |
| OSBPL3      | -0.060990576 | 0.00993  |
| NARF        | 0.157492679  | 0.009938 |
| LTV1        | -0.102416608 | 0.009945 |
| HACD3       | -0.041594024 | 0.00995  |
| KDM2B       | -0.04314069  | 0.009994 |

Note: *P*-value < 0.01 was set as the threshold.

Abbreviation: DEGs = differentially expressed genes.

**ST 2.** GO output of hub genes in MS

| ID         | Description                                 | GeneRatio | Count | P value  |
|------------|---------------------------------------------|-----------|-------|----------|
| GO:0002576 | platelet degranulation                      | 11/50     | 11    | 3.03E-14 |
| GO:0030168 | platelet activation                         | 11/50     | 11    | 2.21E-13 |
| GO:0007596 | blood coagulation                           | 12/50     | 12    | 6.24E-11 |
| GO:0007599 | hemostasis                                  | 12/50     | 12    | 7.40E-11 |
| GO:0050817 | coagulation                                 | 12/50     | 12    | 7.66E-11 |
| GO:0061041 | regulation of wound healing                 | 6/50      | 6     | 2.67E-06 |
| GO:1903034 | regulation of response to wounding          | 6/50      | 6     | 8.00E-06 |
| GO:0070527 | platelet aggregation                        | 4/50      | 4     | 1.86E-05 |
| GO:0006936 | muscle contraction                          | 7/50      | 7     | 4.82E-05 |
| GO:0050900 | leukocyte migration                         | 8/50      | 8     | 4.93E-05 |
| GO:0030193 | regulation of blood coagulation             | 4/50      | 4     | 5.90E-05 |
| GO:1900046 | regulation of hemostasis                    | 4/50      | 4     | 6.20E-05 |
| GO:0034109 | homotypic cell-cell adhesion                | 4/50      | 4     | 6.51E-05 |
| GO:0050818 | regulation of coagulation                   | 4/50      | 4     | 7.50E-05 |
| GO:0010543 | regulation of platelet activation           | 3/50      | 3     | 7.71E-05 |
| GO:1901568 | fatty acid derivative metabolic process     | 5/50      | 5     | 8.25E-05 |
| GO:0006937 | regulation of muscle contraction            | 5/50      | 5     | 9.23E-05 |
| GO:1901570 | fatty acid derivative biosynthetic process  | 4/50      | 4     | 0.000142 |
| GO:0001676 | long-chain fatty acid metabolic process     | 4/50      | 4     | 0.000206 |
| GO:0033559 | unsaturated fatty acid metabolic process    | 4/50      | 4     | 0.000213 |
| GO:0003012 | muscle system process                       | 7/50      | 7     | 0.000246 |
| GO:0070252 | actin-mediated cell contraction             | 4/50      | 4     | 0.000307 |
| GO:0019369 | arachidonic acid metabolic process          | 3/50      | 3     | 0.000344 |
| GO:0030195 | negative regulation of blood coagulation    | 3/50      | 3     | 0.000385 |
| GO:0006636 | unsaturated fatty acid biosynthetic process | 3/50      | 3     | 0.000407 |
| GO:1900047 | negative regulation of hemostasis           | 3/50      | 3     | 0.000407 |
| GO:0050819 | negative regulation of coagulation          | 3/50      | 3     | 0.000478 |
| GO:0030048 | actin filament-based movement               | 4/50      | 4     | 0.000578 |
| GO:0090257 | regulation of muscle system process         | 5/50      | 5     | 0.000629 |
| GO:0043217 | myelin maintenance                          | 2/50      | 2     | 0.000823 |
| GO:0006633 | fatty acid biosynthetic process             | 4/50      | 4     | 0.000965 |

|            |                                                            |      |   |          |
|------------|------------------------------------------------------------|------|---|----------|
| GO:0061045 | negative regulation of wound healing                       | 3/50 | 3 | 0.001107 |
| GO:0010634 | positive regulation of epithelial cell migration           | 4/50 | 4 | 0.001127 |
| GO:0010544 | negative regulation of platelet activation                 | 2/50 | 2 | 0.001167 |
| GO:0035338 | long-chain fatty-acyl-CoA biosynthetic process             | 2/50 | 2 | 0.001167 |
| GO:0045652 | regulation of megakaryocyte differentiation                | 3/50 | 3 | 0.001239 |
| GO:0006941 | striated muscle contraction                                | 4/50 | 4 | 0.00128  |
| GO:0097581 | lamellipodium organization                                 | 3/50 | 3 | 0.001379 |
| GO:1903035 | negative regulation of response to wounding                | 3/50 | 3 | 0.001802 |
| GO:0014909 | smooth muscle cell migration                               | 3/50 | 3 | 0.00186  |
| GO:0035336 | long-chain fatty-acyl-CoA metabolic process                | 2/50 | 2 | 0.002027 |
| GO:1902905 | positive regulation of supramolecular fiber organization   | 4/50 | 4 | 0.002152 |
| GO:0030219 | megakaryocyte differentiation                              | 3/50 | 3 | 0.002168 |
| GO:0007229 | integrin-mediated signaling pathway                        | 3/50 | 3 | 0.002648 |
| GO:0014812 | muscle cell migration                                      | 3/50 | 3 | 0.002722 |
| GO:0007009 | plasma membrane organization                               | 3/50 | 3 | 0.002796 |
| GO:0000038 | very long-chain fatty acid metabolic process               | 2/50 | 2 | 0.002915 |
| GO:0010743 | regulation of macrophage derived foam cell differentiation | 2/50 | 2 | 0.002915 |
| GO:0030198 | extracellular matrix organization                          | 5/50 | 5 | 0.002964 |
| GO:0043062 | extracellular structure organization                       | 5/50 | 5 | 0.002998 |
| GO:0007160 | cell-matrix adhesion                                       | 4/50 | 4 | 0.003065 |
| GO:0046949 | fatty-acyl-CoA biosynthetic process                        | 2/50 | 2 | 0.003312 |
| GO:0006631 | fatty acid metabolic process                               | 5/50 | 5 | 0.003516 |
| GO:0006690 | icosanoid metabolic process                                | 3/50 | 3 | 0.003527 |
| GO:0072330 | monocarboxylic acid biosynthetic process                   | 4/50 | 4 | 0.00369  |
| GO:0033363 | secretory granule organization                             | 2/50 | 2 | 0.003953 |
| GO:0010742 | macrophage derived foam cell differentiation               | 2/50 | 2 | 0.004178 |
| GO:0090077 | foam cell differentiation                                  | 2/50 | 2 | 0.004178 |
| GO:0007015 | actin filament organization                                | 5/50 | 5 | 0.004228 |

|            |                                                       |      |   |          |
|------------|-------------------------------------------------------|------|---|----------|
| GO:0019730 | antimicrobial humoral response                        | 3/50 | 3 | 0.004266 |
| GO:0010595 | positive regulation of endothelial cell migration     | 3/50 | 3 | 0.004878 |
| GO:0030049 | muscle filament sliding                               | 2/50 | 2 | 0.004889 |
| GO:0033275 | actin-myosin filament sliding                         | 2/50 | 2 | 0.004889 |
| GO:0042552 | myelination                                           | 3/50 | 3 | 0.005313 |
| GO:0035337 | fatty-acyl-CoA metabolic process                      | 2/50 | 2 | 0.005392 |
| GO:0007272 | ensheathment of neurons                               | 3/50 | 3 | 0.00554  |
| GO:0008366 | axon ensheathment                                     | 3/50 | 3 | 0.00554  |
| GO:0060048 | cardiac muscle contraction                            | 3/50 | 3 | 0.006253 |
| GO:0010256 | endomembrane system organization                      | 5/50 | 5 | 0.006602 |
| GO:0050919 | negative chemotaxis                                   | 2/50 | 2 | 0.006748 |
| GO:0008643 | carbohydrate transport                                | 3/50 | 3 | 0.007287 |
| GO:0010632 | regulation of epithelial cell migration               | 4/50 | 4 | 0.007585 |
| GO:0003254 | regulation of membrane depolarization                 | 2/50 | 2 | 0.007628 |
| GO:0051017 | actin filament bundle assembly                        | 3/50 | 3 | 0.007981 |
| GO:0061572 | actin filament bundle organization                    | 3/50 | 3 | 0.008564 |
| GO:0035384 | thioester biosynthetic process                        | 2/50 | 2 | 0.009204 |
| GO:0071616 | acyl-CoA biosynthetic process                         | 2/50 | 2 | 0.009204 |
| GO:0046456 | icosanoid biosynthetic process                        | 2/50 | 2 | 0.009535 |
| GO:0006898 | receptor-mediated endocytosis                         | 4/50 | 4 | 0.009847 |
| GO:0032233 | positive regulation of actin filament bundle assembly | 2/50 | 2 | 0.011631 |
| GO:0032496 | response to lipopolysaccharide                        | 4/50 | 4 | 0.011656 |
| GO:0001936 | regulation of endothelial cell proliferation          | 3/50 | 3 | 0.01167  |
| GO:0010821 | regulation of mitochondrion organization              | 3/50 | 3 | 0.012212 |
| GO:0002237 | response to molecule of bacterial origin              | 4/50 | 4 | 0.013274 |
| GO:0032956 | regulation of actin cytoskeleton organization         | 4/50 | 4 | 0.013274 |
| GO:0033627 | cell adhesion mediated by integrin                    | 2/50 | 2 | 0.014307 |
| GO:0033866 | nucleoside bisphosphate biosynthetic process          | 2/50 | 2 | 0.014307 |
| GO:0034030 | ribonucleoside bisphosphate biosynthetic process      | 2/50 | 2 | 0.014307 |
| GO:0034033 | purine nucleoside bisphosphate biosynthetic process   | 2/50 | 2 | 0.014307 |
| GO:0010631 | epithelial cell migration                             | 4/50 | 4 | 0.014475 |

|            |                                                                         |           |       |          |
|------------|-------------------------------------------------------------------------|-----------|-------|----------|
| GO:0001935 | endothelial cell proliferation                                          | 3/50      | 3     | 0.014524 |
| GO:1902903 | regulation of supramolecular fiber organization                         | 4/50      | 4     | 0.014612 |
| GO:0031589 | cell-substrate adhesion                                                 | 4/50      | 4     | 0.01475  |
| GO:0046394 | carboxylic acid biosynthetic process                                    | 4/50      | 4     | 0.01489  |
| GO:0090132 | epithelium migration                                                    | 4/50      | 4     | 0.01489  |
| GO:0006959 | humoral immune response                                                 | 4/50      | 4     | 0.01503  |
| GO:0016053 | organic acid biosynthetic process                                       | 4/50      | 4     | 0.01503  |
| GO:0090130 | tissue migration                                                        | 4/50      | 4     | 0.015742 |
| GO:0050866 | negative regulation of cell activation                                  | 3/50      | 3     | 0.016195 |
| GO:0061844 | antimicrobial humoral immune response mediated by antimicrobial peptide | 2/50      | 2     | 0.016366 |
| GO:0032970 | regulation of actin filament-based process                              | 4/50      | 4     | 0.019959 |
| ID         | Description                                                             | GeneRatio | Count | pvalue   |
| GO:0051015 | actin filament binding                                                  | 6/48      | 6     | 1.51E-05 |
| GO:0050840 | extracellular matrix binding                                            | 3/48      | 3     | 0.000494 |
| GO:0005161 | platelet-derived growth factor receptor binding                         | 2/48      | 2     | 0.00074  |
| GO:0005518 | collagen binding                                                        | 3/48      | 3     | 0.000794 |
| GO:0003779 | actin binding                                                           | 6/48      | 6     | 0.001041 |
| GO:0015144 | carbohydrate transmembrane transporter activity                         | 2/48      | 2     | 0.004516 |
| GO:0019838 | growth factor binding                                                   | 3/48      | 3     | 0.006088 |
| GO:0008307 | structural constituent of muscle                                        | 2/48      | 2     | 0.006911 |
| GO:0008009 | chemokine activity                                                      | 2/48      | 2     | 0.007812 |
| GO:0008201 | heparin binding                                                         | 3/48      | 3     | 0.010805 |
| GO:0048306 | calcium-dependent protein binding                                       | 2/48      | 2     | 0.011908 |
| GO:0042379 | chemokine receptor binding                                              | 2/48      | 2     | 0.013839 |
| GO:0001618 | virus receptor activity                                                 | 2/48      | 2     | 0.017189 |
| GO:0140272 | exogenous protein binding                                               | 2/48      | 2     | 0.017189 |
| GO:0005125 | cytokine activity                                                       | 3/48      | 3     | 0.021751 |
| GO:0005539 | glycosaminoglycan binding                                               | 3/48      | 3     | 0.024135 |
| GO:0051213 | dioxygenase activity                                                    | 2/48      | 2     | 0.025313 |
| GO:0016803 | ether hydrolase activity                                                | 1/48      | 1     | 0.026803 |
| GO:0004312 | fatty acid synthase activity                                            | 1/48      | 1     | 0.029444 |
| GO:0005522 | profilin binding                                                        | 1/48      | 1     | 0.029444 |
| GO:0015250 | water channel activity                                                  | 1/48      | 1     | 0.029444 |



|            |                                                               |      |   |          |
|------------|---------------------------------------------------------------|------|---|----------|
| GO:0016801 | hydrolase activity, acting on ether bonds                     | 1/48 | 1 | 0.029444 |
| GO:0045236 | CXCR chemokine receptor binding                               | 1/48 | 1 | 0.029444 |
| GO:0048407 | platelet-derived growth factor binding                        | 1/48 | 1 | 0.029444 |
| GO:0070411 | I-SMAD binding                                                | 1/48 | 1 | 0.029444 |
| GO:1901681 | sulfur compound binding                                       | 3/48 | 3 | 0.030228 |
| GO:0005200 | structural constituent of cytoskeleton                        | 2/48 | 2 | 0.031249 |
| GO:0005372 | water transmembrane transporter activity                      | 1/48 | 1 | 0.032078 |
| GO:0031994 | insulin-like growth factor I binding                          | 1/48 | 1 | 0.032078 |
| GO:0032036 | myosin heavy chain binding                                    | 1/48 | 1 | 0.032078 |
| GO:0033691 | sialic acid binding                                           | 1/48 | 1 | 0.032078 |
| GO:0004467 | long-chain fatty acid-CoA ligase activity                     | 1/48 | 1 | 0.034706 |
| GO:0005172 | vascular endothelial growth factor receptor binding           | 1/48 | 1 | 0.034706 |
| GO:0042043 | neurexin family protein binding                               | 1/48 | 1 | 0.034706 |
| GO:0030553 | cGMP binding                                                  | 1/48 | 1 | 0.039939 |
| GO:0070492 | oligosaccharide binding                                       | 1/48 | 1 | 0.039939 |
| GO:0001664 | G protein-coupled receptor binding                            | 3/48 | 3 | 0.040211 |
| GO:0048018 | receptor ligand activity                                      | 4/48 | 4 | 0.041255 |
| GO:0005126 | cytokine receptor binding                                     | 3/48 | 3 | 0.042386 |
| GO:0003756 | protein disulfide isomerase activity                          | 1/48 | 1 | 0.042545 |
| GO:0003996 | acyl-CoA ligase activity                                      | 1/48 | 1 | 0.042545 |
| GO:0008093 | cytoskeletal anchor activity                                  | 1/48 | 1 | 0.042545 |
| GO:0016864 | intramolecular oxidoreductase activity, transposing S-S bonds | 1/48 | 1 | 0.042545 |
| GO:0030546 | signaling receptor activator activity                         | 4/48 | 4 | 0.042583 |
| GO:0047555 | 3',5'-cyclic-GMP phosphodiesterase activity                   | 1/48 | 1 | 0.047737 |
| GO:0005178 | integrin binding                                              | 2/48 | 2 | 0.049846 |
| GO:0004622 | lysophospholipase activity                                    | 1/48 | 1 | 0.050323 |
| GO:0070300 | phosphatidic acid binding                                     | 1/48 | 1 | 0.050323 |
| GO:0070851 | growth factor receptor binding                                | 2/48 | 2 | 0.0512   |
| GO:0005248 | voltage-gated sodium channel activity                         | 1/48 | 1 | 0.052902 |

|            |                                                                                                                               |      |   |          |
|------------|-------------------------------------------------------------------------------------------------------------------------------|------|---|----------|
| GO:0005355 | glucose transmembrane transporter activity                                                                                    | 1/48 | 1 | 0.052902 |
| GO:0015149 | hexose transmembrane transporter activity                                                                                     | 1/48 | 1 | 0.052902 |
| GO:0031683 | G-protein beta/gamma-subunit complex binding                                                                                  | 1/48 | 1 | 0.052902 |
| GO:0015645 | fatty acid ligase activity                                                                                                    | 1/48 | 1 | 0.055474 |
| GO:0050750 | low-density lipoprotein particle receptor binding                                                                             | 1/48 | 1 | 0.055474 |
| GO:0051861 | glycolipid binding                                                                                                            | 1/48 | 1 | 0.055474 |
| GO:0003924 | GTPase activity                                                                                                               | 3/48 | 3 | 0.057503 |
| GO:0015145 | monosaccharide transmembrane transporter activity                                                                             | 1/48 | 1 | 0.058039 |
| GO:0017134 | fibroblast growth factor binding                                                                                              | 1/48 | 1 | 0.060597 |
| GO:0046625 | sphingolipid binding                                                                                                          | 1/48 | 1 | 0.060597 |
| GO:0051119 | sugar transmembrane transporter activity                                                                                      | 1/48 | 1 | 0.063148 |
| GO:0035257 | nuclear hormone receptor binding                                                                                              | 2/48 | 2 | 0.063962 |
| GO:0043027 | cysteine-type endopeptidase inhibitor activity involved in apoptotic process                                                  | 1/48 | 1 | 0.065693 |
| GO:0016405 | CoA-ligase activity                                                                                                           | 1/48 | 1 | 0.068231 |
| GO:0051787 | misfolded protein binding                                                                                                     | 1/48 | 1 | 0.068231 |
| GO:0070325 | lipoprotein particle receptor binding                                                                                         | 1/48 | 1 | 0.068231 |
| GO:1901981 | phosphatidylinositol phosphate binding                                                                                        | 2/48 | 2 | 0.070706 |
| GO:0001968 | fibronectin binding                                                                                                           | 1/48 | 1 | 0.070762 |
| GO:0016702 | oxidoreductase activity, acting on single donors with incorporation of molecular oxygen, incorporation of two atoms of oxygen | 1/48 | 1 | 0.070762 |
| GO:0008083 | growth factor activity                                                                                                        | 2/48 | 2 | 0.072235 |
| GO:0004114 | 3',5'-cyclic-nucleotide phosphodiesterase activity                                                                            | 1/48 | 1 | 0.073286 |
| GO:0005520 | insulin-like growth factor binding                                                                                            | 1/48 | 1 | 0.073286 |
| GO:0016701 | oxidoreductase activity, acting on single donors with incorporation of molecular oxygen                                       | 1/48 | 1 | 0.073286 |
| GO:0004112 | cyclic-nucleotide phosphodiesterase activity                                                                                  | 1/48 | 1 | 0.075804 |
| GO:0046966 | thyroid hormone receptor binding                                                                                              | 1/48 | 1 | 0.075804 |

|            |                                                                              |           |       |          |
|------------|------------------------------------------------------------------------------|-----------|-------|----------|
| GO:0016878 | acid-thiol ligase activity                                                   | 1/48      | 1     | 0.078315 |
| GO:0004866 | endopeptidase inhibitor activity                                             | 2/48      | 2     | 0.081634 |
| GO:0019956 | chemokine binding                                                            | 1/48      | 1     | 0.083317 |
| GO:0030414 | peptidase inhibitor activity                                                 | 2/48      | 2     | 0.087284 |
| GO:0061135 | endopeptidase regulator activity                                             | 2/48      | 2     | 0.087284 |
| GO:0051427 | hormone receptor binding                                                     | 2/48      | 2     | 0.08974  |
| GO:0001530 | lipopolysaccharide binding                                                   | 1/48      | 1     | 0.09077  |
| GO:0019001 | guanyl nucleotide binding                                                    | 3/48      | 3     | 0.091036 |
| GO:0032561 | guanyl ribonucleotide binding                                                | 3/48      | 3     | 0.091036 |
| GO:0017080 | sodium channel regulator activity                                            | 1/48      | 1     | 0.093241 |
| GO:0030551 | cyclic nucleotide binding                                                    | 1/48      | 1     | 0.093241 |
| GO:0008200 | ion channel inhibitor activity                                               | 1/48      | 1     | 0.095706 |
| GO:0016248 | channel inhibitor activity                                                   | 1/48      | 1     | 0.098164 |
| GO:0005547 | phosphatidylinositol-3,4,5-trisphosphate binding                             | 1/48      | 1     | 0.100615 |
| GO:0016877 | ligase activity, forming carbon-sulfur bonds                                 | 1/48      | 1     | 0.10306  |
| GO:0005272 | sodium channel activity                                                      | 1/48      | 1     | 0.105499 |
| GO:0043028 | cysteine-type endopeptidase regulator activity involved in apoptotic process | 1/48      | 1     | 0.107931 |
| GO:0005543 | phospholipid binding                                                         | 3/48      | 3     | 0.109144 |
| GO:0015026 | coreceptor activity                                                          | 1/48      | 1     | 0.112775 |
| GO:0050681 | androgen receptor binding                                                    | 1/48      | 1     | 0.112775 |
| GO:1901618 | organic hydroxy compound transmembrane transporter activity                  | 1/48      | 1     | 0.112775 |
| GO:0048156 | tau protein binding                                                          | 1/48      | 1     | 0.115188 |
| GO:0061134 | peptidase regulator activity                                                 | 2/48      | 2     | 0.118915 |
| GO:0016860 | intramolecular oxidoreductase activity                                       | 1/48      | 1     | 0.119994 |
| GO:0042887 | amide transmembrane transporter activity                                     | 1/48      | 1     | 0.119994 |
| GO:0004601 | peroxidase activity                                                          | 1/48      | 1     | 0.131897 |
| ID         | Description                                                                  | GeneRatio | Count | pvalue   |
| GO:0031091 | platelet alpha granule                                                       | 12/52     | 12    | 7.82E-18 |
| GO:0031092 | platelet alpha granule membrane                                              | 6/52      | 6     | 3.02E-12 |
| GO:0031093 | platelet alpha granule lumen                                                 | 6/52      | 6     | 2.21E-08 |
| GO:0030667 | secretory granule membrane                                                   | 7/52      | 7     | 1.25E-05 |
| GO:0032432 | actin filament bundle                                                        | 4/52      | 4     | 4.55E-05 |
| GO:0008305 | integrin complex                                                             | 3/52      | 3     | 7.38E-05 |
| GO:0098636 | protein complex involved in cell adhesion                                    | 3/52      | 3     | 9.77E-05 |

|            |                                                |      |   |          |
|------------|------------------------------------------------|------|---|----------|
| GO:0034774 | secretory granule lumen                        | 6/52 | 6 | 0.000193 |
| GO:0060205 | cytoplasmic vesicle lumen                      | 6/52 | 6 | 0.000206 |
| GO:0031983 | vesicle lumen                                  | 6/52 | 6 | 0.000213 |
| GO:0097197 | tetraspanin-enriched microdomain               | 2/52 | 2 | 0.000303 |
| GO:0005925 | focal adhesion                                 | 6/52 | 6 | 0.000663 |
| GO:0062023 | collagen-containing extracellular matrix       | 6/52 | 6 | 0.000672 |
| GO:0030055 | cell-substrate junction                        | 6/52 | 6 | 0.000725 |
| GO:0001725 | stress fiber                                   | 3/52 | 3 | 0.000736 |
| GO:0097517 | contractile actin filament bundle              | 3/52 | 3 | 0.000736 |
| GO:0001726 | ruffle                                         | 4/52 | 4 | 0.001092 |
| GO:0042641 | actomyosin                                     | 3/52 | 3 | 0.001188 |
| GO:0005902 | microvillus                                    | 3/52 | 3 | 0.00137  |
| GO:0030027 | lamellipodium                                  | 4/52 | 4 | 0.001669 |
| GO:0005796 | Golgi lumen                                    | 3/52 | 3 | 0.002472 |
| GO:0005865 | striated muscle thin filament                  | 2/52 | 2 | 0.003021 |
| GO:0036379 | myofilament                                    | 2/52 | 2 | 0.003217 |
| GO:0031252 | cell leading edge                              | 5/52 | 5 | 0.004111 |
| GO:0072562 | blood microparticle                            | 3/52 | 3 | 0.006871 |
| GO:0019898 | extrinsic component of membrane                | 4/52 | 4 | 0.007566 |
| GO:0098978 | glutamatergic synapse                          | 4/52 | 4 | 0.013403 |
| GO:0030017 | sarcomere                                      | 3/52 | 3 | 0.016633 |
| GO:0098858 | actin-based cell projection                    | 3/52 | 3 | 0.017508 |
| GO:0030016 | myofibril                                      | 3/52 | 3 | 0.021258 |
| GO:0043292 | contractile fiber                              | 3/52 | 3 | 0.023809 |
| GO:0032587 | ruffle membrane                                | 2/52 | 2 | 0.025552 |
| GO:0033655 | host cell cytoplasm part                       | 1/52 | 1 | 0.026068 |
| GO:0030430 | host cell cytoplasm                            | 1/52 | 1 | 0.028638 |
| GO:0030175 | filopodium                                     | 2/52 | 2 | 0.030794 |
| GO:0016363 | nuclear matrix                                 | 2/52 | 2 | 0.033561 |
| GO:1990023 | mitotic spindle midzone                        | 1/52 | 1 | 0.033758 |
| GO:0005884 | actin filament                                 | 2/52 | 2 | 0.034695 |
| GO:0001518 | voltage-gated sodium channel complex           | 1/52 | 1 | 0.036308 |
| GO:0005859 | muscle myosin complex                          | 1/52 | 1 | 0.038851 |
| GO:0012510 | trans-Golgi network transport vesicle membrane | 1/52 | 1 | 0.038851 |
| GO:0033268 | node of Ranvier                                | 1/52 | 1 | 0.038851 |
| GO:0033646 | host intracellular part                        | 1/52 | 1 | 0.041388 |
| GO:0043656 | host intracellular region                      | 1/52 | 1 | 0.041388 |
| GO:0098802 | plasma membrane signaling receptor complex     | 3/52 | 3 | 0.042805 |
| GO:0097440 | apical dendrite                                | 1/52 | 1 | 0.043918 |

|            |                                       |      |   |          |
|------------|---------------------------------------|------|---|----------|
| GO:0031527 | filopodium membrane                   | 1/52 | 1 | 0.046442 |
| GO:0032433 | filopodium tip                        | 1/52 | 1 | 0.046442 |
| GO:0033643 | host cell part                        | 1/52 | 1 | 0.046442 |
| GO:0034399 | nuclear periphery                     | 2/52 | 2 | 0.046814 |
| GO:0016460 | myosin II complex                     | 1/52 | 1 | 0.048959 |
| GO:0042383 | sarcolemma                            | 2/52 | 2 | 0.050055 |
| GO:0071682 | endocytic vesicle lumen               | 1/52 | 1 | 0.05147  |
| GO:0042827 | platelet dense granule                | 1/52 | 1 | 0.053974 |
| GO:0031258 | lamellipodium membrane                | 1/52 | 1 | 0.056471 |
| GO:0097038 | perinuclear endoplasmic reticulum     | 1/52 | 1 | 0.056471 |
| GO:0002080 | acrosomal membrane                    | 1/52 | 1 | 0.058963 |
| GO:0031528 | microvillus membrane                  | 1/52 | 1 | 0.058963 |
| GO:0034706 | sodium channel complex                | 1/52 | 1 | 0.058963 |
| GO:0043197 | dendritic spine                       | 2/52 | 2 | 0.065943 |
| GO:0034364 | high-density lipoprotein particle     | 1/52 | 1 | 0.066397 |
| GO:0044309 | neuron spine                          | 2/52 | 2 | 0.067396 |
| GO:0031256 | leading edge membrane                 | 2/52 | 2 | 0.074064 |
| GO:0002102 | podosome                              | 1/52 | 1 | 0.076221 |
| GO:0005834 | heterotrimeric G-protein complex      | 1/52 | 1 | 0.076221 |
| GO:1905360 | GTPase complex                        | 1/52 | 1 | 0.076221 |
| GO:0030140 | trans-Golgi network transport vesicle | 1/52 | 1 | 0.078661 |
| GO:0051233 | spindle midzone                       | 1/52 | 1 | 0.085943 |
| GO:0034358 | plasma lipoprotein particle           | 1/52 | 1 | 0.093169 |
| GO:1990777 | lipoprotein particle                  | 1/52 | 1 | 0.093169 |
| GO:0032994 | protein-lipid complex                 | 1/52 | 1 | 0.097955 |
| GO:0030658 | transport vesicle membrane            | 2/52 | 2 | 0.104312 |
| GO:0034703 | cation channel complex                | 2/52 | 2 | 0.114471 |
| GO:0014704 | intercalated disc                     | 1/52 | 1 | 0.123838 |
| GO:0030315 | T-tubule                              | 1/52 | 1 | 0.128466 |
| GO:0016459 | myosin complex                        | 1/52 | 1 | 0.135361 |
| GO:1904724 | tertiary granule lumen                | 1/52 | 1 | 0.135361 |

Note: *P*-value < 0.05 was set as the cut-off criteria.

**ST 3. KEGG output of hub genes in MS**

| ID       | Description                                                   | GeneRatio | Count | <i>P</i> value |
|----------|---------------------------------------------------------------|-----------|-------|----------------|
| hsa04611 | Platelet activation                                           | 6/28      | 6     | 3.26E-06       |
| hsa04512 | ECM-receptor interaction                                      | 5/28      | 5     | 1.09E-05       |
| hsa05410 | Hypertrophic cardiomyopathy                                   | 4/28      | 4     | 0.000238       |
| hsa05414 | Dilated cardiomyopathy                                        | 4/28      | 4     | 0.000305       |
| hsa04510 | Focal adhesion                                                | 5/28      | 5     | 0.000552       |
| hsa04810 | Regulation of actin cytoskeleton                              | 5/28      | 5     | 0.000798       |
| hsa05412 | Arrhythmogenic right ventricular cardiomyopathy               | 3/28      | 3     | 0.002279       |
| hsa04610 | Complement and coagulation cascades                           | 3/28      | 3     | 0.003021       |
| hsa04640 | Hematopoietic cell lineage                                    | 3/28      | 3     | 0.004645       |
| hsa04015 | Rap1 signaling pathway                                        | 4/28      | 4     | 0.005511       |
| hsa05418 | Fluid shear stress and atherosclerosis                        | 3/28      | 3     | 0.011831       |
| hsa04145 | Phagosome                                                     | 3/28      | 3     | 0.015044       |
| hsa01212 | Fatty acid metabolism                                         | 2/28      | 2     | 0.016349       |
| hsa04923 | Regulation of lipolysis in adipocytes                         | 2/28      | 2     | 0.016349       |
| hsa00590 | Arachidonic acid metabolism                                   | 2/28      | 2     | 0.018588       |
| hsa04530 | Tight junction                                                | 3/28      | 3     | 0.019926       |
| hsa04613 | Neutrophil extracellular trap formation                       | 3/28      | 3     | 0.02704        |
| hsa04151 | PI3K-Akt signaling pathway                                    | 4/28      | 4     | 0.032018       |
| hsa05205 | Proteoglycans in cancer                                       | 3/28      | 3     | 0.032856       |
| hsa04540 | Gap junction                                                  | 2/28      | 2     | 0.036726       |
| hsa04061 | Viral protein interaction with cytokine and cytokine receptor | 2/28      | 2     | 0.046305       |
| hsa04670 | Leukocyte transendothelial migration                          | 2/28      | 2     | 0.058507       |
| hsa04726 | Serotonergic synapse                                          | 2/28      | 2     | 0.059418       |
| hsa00061 | Fatty acid biosynthesis                                       | 1/28      | 1     | 0.060474       |

**ST 4. DEGs in OA dataset (GSE51588)**

| Genesymbol | logFC    | <i>P</i> value |
|------------|----------|----------------|
| IL1R2      | -4.18068 | 2.94E-22       |
| FPR1       | -3.62994 | 1.15E-19       |
| SRGN       | -3.54628 | 1.79E-19       |
| ANP32E     | -1.18253 | 1.02E-18       |
| FOXS1      | 3.36943  | 1.06E-17       |
| SLA        | -1.97451 | 2.63E-17       |
| SIAH2      | -1.1094  | 2.65E-17       |
| TKT        | -1.81787 | 3.56E-17       |
| LPCAT3     | -1.3876  | 4.57E-17       |
| IRAK3      | -1.68631 | 5.61E-17       |
| RPIA       | -1.23314 | 1.12E-16       |
| ANP32B     | -1.00173 | 1.34E-16       |
| IQCD       | 1.368318 | 3.28E-16       |
| FBXL2      | 1.495373 | 4.68E-16       |
| DHRS13     | -2.1119  | 6.66E-16       |
| TBC1D8B    | 1.471606 | 1.57E-15       |
| CC2D2A     | 1.338195 | 2.17E-15       |
| AFAP1L2    | 1.09636  | 4.57E-15       |
| RUNX1T1    | 1.373971 | 4.71E-15       |
| ARG1       | -4.85178 | 6.07E-15       |
| SLC7A5     | -2.61634 | 6.94E-15       |
| ZNF287     | 1.279899 | 8.69E-15       |
| SLC22A4    | -2.91612 | 9.01E-15       |
| GLRX       | -1.41816 | 9.58E-15       |
| PGD        | -2.16115 | 1.07E-14       |
| FAM100B    | -1.02632 | 1.08E-14       |
| CRIP1      | 1.132813 | 1.14E-14       |
| ZNF793     | 1.16259  | 1.17E-14       |
| C3orf18    | 1.006169 | 1.62E-14       |
| NME5       | 1.044871 | 1.65E-14       |
| BAZ1A      | -1.32296 | 1.84E-14       |
| P2RY8      | -2.17399 | 1.90E-14       |
| PPIF       | -1.69946 | 2.35E-14       |
| HMGB2      | -2.15903 | 2.59E-14       |
| H2AFY      | -1.04231 | 3.15E-14       |
| KLF12      | 1.217864 | 3.92E-14       |
| C5AR1      | -2.48314 | 4.12E-14       |
| ACCN2      | 1.565905 | 6.13E-14       |
| PRRT2      | 2.239944 | 7.43E-14       |
| LOC648149  | 1.7175   | 8.42E-14       |

|           |          |          |
|-----------|----------|----------|
| ZNF135    | 1.202678 | 8.45E-14 |
| GPR124    | 1.219307 | 8.74E-14 |
| HECW2     | 1.855753 | 1.14E-13 |
| MAP1B     | 1.397833 | 1.48E-13 |
| LOC286063 | 1.351816 | 1.52E-13 |
| UGCG      | -1.21238 | 1.54E-13 |
| S100A9    | -5.54812 | 1.59E-13 |
| PTPLA     | -1.02592 | 1.61E-13 |
| ISG20     | -1.42794 | 1.63E-13 |
| TMC7      | 1.469766 | 1.73E-13 |
| KIAA1671  | 1.192984 | 2.27E-13 |
| CCL23     | -2.66916 | 2.66E-13 |
| GYPC      | -1.34084 | 2.79E-13 |
| CSRNP3    | 1.520388 | 2.88E-13 |
| PLXDC1    | 1.810014 | 3.01E-13 |
| ABHD5     | -1.54585 | 3.13E-13 |
| ADAMTS10  | 1.543616 | 3.25E-13 |
| SRPK1     | -1.00302 | 3.59E-13 |
| ZNF30     | 1.002145 | 4.40E-13 |
| CCDC113   | 1.424848 | 4.48E-13 |
| C4orf39   | 1.102368 | 5.08E-13 |
| TM4SF18   | 1.490852 | 5.23E-13 |
| CCDC74B   | 1.216053 | 5.43E-13 |
| C1orf162  | -1.92318 | 6.42E-13 |
| SPIN3     | 1.159853 | 7.84E-13 |
| ECM2      | 1.431416 | 9.00E-13 |
| SIGLEC12  | -2.78965 | 9.17E-13 |
| CLEC1B    | -3.926   | 9.94E-13 |
| LINC00478 | 1.280639 | 9.96E-13 |
| CD34      | 1.129712 | 1.03E-12 |
| THSD1     | 1.083482 | 1.03E-12 |
| ALOX5AP   | -2.09424 | 1.13E-12 |
| SNRPB     | -1.16219 | 1.33E-12 |
| HNRNPAB   | -1.48398 | 1.33E-12 |
| SERPINB1  | -1.57924 | 1.34E-12 |
| CMYA5     | 1.246217 | 1.40E-12 |
| S100P     | -4.9934  | 1.41E-12 |
| RCAN2     | 1.121837 | 1.46E-12 |
| LILRB3    | -1.27926 | 1.47E-12 |
| GUCY1A3   | 1.514386 | 1.52E-12 |
| ANO1      | 1.41348  | 1.56E-12 |
| PRR5L     | 1.141006 | 1.68E-12 |
| GADD45A   | -2.21968 | 1.76E-12 |



|          |          |          |
|----------|----------|----------|
| CCDC30   | 1.435425 | 1.80E-12 |
| LIN7A    | -2.69964 | 2.01E-12 |
| PRRT4    | -2.91154 | 2.07E-12 |
| FGR      | -1.8626  | 2.07E-12 |
| CCDC65   | 1.669237 | 2.09E-12 |
| KLK1     | 1.911876 | 2.11E-12 |
| SVEP1    | 1.103175 | 2.19E-12 |
| B4GALNT1 | 1.605651 | 2.23E-12 |
| GCA      | -2.14643 | 2.39E-12 |
| GPR125   | 1.102925 | 2.99E-12 |
| ISLR     | 1.298457 | 3.15E-12 |
| RARG     | 1.231872 | 3.31E-12 |
| FCAR     | -2.52195 | 3.35E-12 |
| PNP      | -1.73765 | 3.37E-12 |
| SSPN     | 1.12512  | 3.58E-12 |
| SLIT2    | 1.590719 | 3.58E-12 |
| SIGLEC10 | -1.35866 | 4.10E-12 |
| CXCR4    | -1.89497 | 4.28E-12 |
| METTL20  | 1.106677 | 4.34E-12 |
| KIAA1199 | 1.610511 | 4.35E-12 |
| DHCR7    | -1.12143 | 4.71E-12 |
| MRAP2    | 2.021146 | 4.93E-12 |
| MBL1P    | 1.545603 | 4.97E-12 |
| ZNF781   | 1.181941 | 5.00E-12 |
| MYLK     | 1.294899 | 5.11E-12 |
| C19orf59 | -2.69121 | 5.13E-12 |
| WDR27    | 1.139599 | 5.56E-12 |
| LRG1     | -2.0196  | 5.72E-12 |
| DDX39A   | -1.02041 | 5.87E-12 |
| C6orf225 | 1.122503 | 6.07E-12 |
| HCLS1    | -1.21179 | 6.45E-12 |
| FPR2     | -1.65701 | 6.75E-12 |
| DPYSL3   | 1.380276 | 7.59E-12 |
| GLI1     | 2.382374 | 8.56E-12 |
| CX3CR1   | 2.585863 | 9.13E-12 |
| ZNF436   | 1.329391 | 9.16E-12 |
| EPHA4    | 1.075516 | 9.18E-12 |
| TET1     | 1.002472 | 9.64E-12 |
| HRH4     | -2.55866 | 1.04E-11 |
| IL17RA   | -1.11375 | 1.07E-11 |
| SAMSN1   | -1.9588  | 1.08E-11 |
| RNF144B  | -1.08921 | 1.15E-11 |
| PRDX6    | -1.0444  | 1.16E-11 |

|              |          |          |
|--------------|----------|----------|
| RNF207       | 1.319248 | 1.24E-11 |
| ZNF503-AS2   | 1.09779  | 1.29E-11 |
| MTMR9LP      | 1.279054 | 1.66E-11 |
| PLEKHG4      | 1.180569 | 1.66E-11 |
| LRRC7        | 2.05702  | 1.81E-11 |
| ARHGEF10     | 1.118805 | 1.97E-11 |
| DCLK1        | 1.189538 | 2.20E-11 |
| PTPRD        | 1.829728 | 2.25E-11 |
| TLR3         | 1.201807 | 2.26E-11 |
| RAB20        | -1.49413 | 2.36E-11 |
| BMP3         | 1.652361 | 2.52E-11 |
| GRK6         | -1.0933  | 2.56E-11 |
| LBR          | -1.22589 | 2.57E-11 |
| UNC5B        | 1.663589 | 2.65E-11 |
| LOC100288428 | 1.532485 | 2.78E-11 |
| DNALI1       | 1.302188 | 2.79E-11 |
| PPFIBP2      | 1.371156 | 2.81E-11 |
| PMEPA1       | 1.165858 | 2.83E-11 |
| FGD6         | 1.165608 | 2.94E-11 |
| NT5E         | 1.086919 | 2.97E-11 |
| ZNF575       | 1.120058 | 3.13E-11 |
| ORM1         | -2.33382 | 3.29E-11 |
| TRIM47       | 1.154339 | 3.30E-11 |
| BCL2A1       | -1.66205 | 3.30E-11 |
| ETV1         | 1.266714 | 3.59E-11 |
| APLNR        | 1.667911 | 3.75E-11 |
| REEP2        | 1.334889 | 3.77E-11 |
| RAB40B       | 1.007828 | 3.85E-11 |
| RNASE2       | -4.82059 | 3.94E-11 |
| LRIG3        | 1.101146 | 4.03E-11 |
| NBPF3        | 1.204691 | 4.12E-11 |
| TCN1         | -4.16111 | 4.36E-11 |
| FLJ13197     | 1.567123 | 4.46E-11 |
| CYS1         | 2.898596 | 4.61E-11 |
| PRTFDC1      | 1.223154 | 4.62E-11 |
| PTCH1        | 1.258175 | 4.97E-11 |
| LOC400684    | 1.41657  | 5.05E-11 |
| EPHB3        | 1.626332 | 5.13E-11 |
| SEPX1        | -1.43085 | 5.34E-11 |
| C18orf1      | 1.021508 | 5.53E-11 |
| SBK1         | 1.489986 | 5.54E-11 |
| C5orf54      | 1.262725 | 5.73E-11 |
| MGC24103     | 1.46322  | 6.29E-11 |

|              |          |          |
|--------------|----------|----------|
| ID1          | 1.504042 | 6.35E-11 |
| FAM201A      | -3.73999 | 6.57E-11 |
| TEX2         | -1.06083 | 6.83E-11 |
| BDNF-AS1     | 1.250869 | 7.10E-11 |
| OLFML2A      | 1.230741 | 7.28E-11 |
| NRARP        | 1.244353 | 7.41E-11 |
| TPTE2P1      | 1.228471 | 7.44E-11 |
| BMX          | -1.26955 | 7.46E-11 |
| KIAA1377     | 1.869747 | 7.60E-11 |
| LINGO1       | 1.43111  | 7.71E-11 |
| TUBA4A       | -1.43275 | 7.91E-11 |
| TLR7         | 2.206081 | 8.01E-11 |
| MED12L       | -1.77321 | 8.04E-11 |
| C11orf63     | 1.125784 | 8.19E-11 |
| LMO7         | 1.428832 | 8.46E-11 |
| ZNF608       | 1.01871  | 8.62E-11 |
| ODC1         | -1.12157 | 9.00E-11 |
| LRRN3        | 1.2102   | 9.07E-11 |
| S100A8       | -5.43886 | 9.10E-11 |
| CCDC89       | 1.28068  | 9.34E-11 |
| RAB7B        | 2.269401 | 9.34E-11 |
| FZD8         | 2.041011 | 9.38E-11 |
| FAM164A      | 1.466297 | 9.52E-11 |
| MAMDC2       | 2.099357 | 9.59E-11 |
| CUBN         | 1.411874 | 9.79E-11 |
| FBN1         | 1.123577 | 9.86E-11 |
| LOC100505933 | 1.011922 | 1.01E-10 |
| CYTIP        | -1.45192 | 1.04E-10 |
| RGS11        | 1.665295 | 1.11E-10 |
| C10orf140    | 1.28687  | 1.11E-10 |
| BID          | -1.04978 | 1.15E-10 |
| EML1         | 1.04548  | 1.18E-10 |
| RHOU         | -1.46372 | 1.24E-10 |
| HMOX1        | -1.56933 | 1.26E-10 |
| TLR2         | -1.52113 | 1.27E-10 |
| GLUL         | -2.26557 | 1.34E-10 |
| SAP30        | -1.52814 | 1.35E-10 |
| SLC25A37     | -2.35604 | 1.38E-10 |
| RNASE3       | -4.83254 | 1.41E-10 |
| ZFHX4        | 1.108392 | 1.43E-10 |
| LINC00256B   | 1.555897 | 1.43E-10 |
| CXorf28      | 1.359885 | 1.46E-10 |
| MATN2        | 1.154748 | 1.48E-10 |

|              |          |          |
|--------------|----------|----------|
| SOD2         | -1.66471 | 1.49E-10 |
| PRICKLE1     | 1.219119 | 1.52E-10 |
| XBP1         | -1.26365 | 1.54E-10 |
| CAPN5        | 1.33357  | 1.61E-10 |
| C9orf3       | 1.268389 | 1.61E-10 |
| FLRT3        | 2.530199 | 1.75E-10 |
| AQP9         | -2.58314 | 1.80E-10 |
| HEY2         | 1.662523 | 1.83E-10 |
| SPAG17       | 1.406724 | 1.99E-10 |
| GLI3         | 1.043709 | 2.09E-10 |
| HIST1H2AD    | -1.59125 | 2.10E-10 |
| LOC641518    | 1.222418 | 2.13E-10 |
| MAPKAPK3     | -1.07862 | 2.23E-10 |
| PLA2R1       | 1.318691 | 2.27E-10 |
| CSDA         | -1.42626 | 2.28E-10 |
| C1orf133     | 1.135352 | 2.28E-10 |
| ANKAR        | 1.18124  | 2.30E-10 |
| C9orf93      | 1.253478 | 2.32E-10 |
| FLJ32063     | 1.805409 | 2.38E-10 |
| CCDC36       | 1.357481 | 2.38E-10 |
| MXRA8        | 1.438159 | 2.80E-10 |
| TAS2R10      | 1.061246 | 2.86E-10 |
| IL18RAP      | -1.6828  | 2.86E-10 |
| ZNF711       | 1.170759 | 2.87E-10 |
| ZFP2         | 1.109041 | 2.91E-10 |
| CBLN3        | 1.394426 | 2.95E-10 |
| SMO          | 1.000501 | 3.33E-10 |
| S100A12      | -5.81584 | 3.42E-10 |
| TFDP2        | -1.13102 | 3.47E-10 |
| KIF25        | 1.770265 | 3.52E-10 |
| EREG         | -2.35118 | 3.62E-10 |
| CTSO         | 1.026889 | 3.70E-10 |
| TRPM4        | 1.056625 | 3.79E-10 |
| DLX6         | 1.261959 | 4.04E-10 |
| CRISP3       | -2.37149 | 4.51E-10 |
| DUSP19       | 1.456073 | 4.87E-10 |
| KBTBD3       | 1.223762 | 4.88E-10 |
| LOC100129940 | 2.328653 | 5.05E-10 |
| RCOR2        | 2.023735 | 5.15E-10 |
| HTR2B        | 2.109784 | 5.20E-10 |
| PROK2        | -3.57141 | 5.26E-10 |
| TAS1R1       | 1.342524 | 5.65E-10 |
| HOXA11-AS1   | 1.08454  | 5.69E-10 |

|           |          |          |
|-----------|----------|----------|
| PLAC9     | 1.021625 | 5.70E-10 |
| PRTN3     | -5.48445 | 6.09E-10 |
| NBPF11    | 1.092574 | 6.45E-10 |
| NEIL3     | -2.60586 | 6.53E-10 |
| NFIL3     | -2.27167 | 6.59E-10 |
| HOXC6     | 1.007717 | 6.62E-10 |
| PRPS1L1   | -1.0302  | 6.69E-10 |
| MPO       | -6.33389 | 6.89E-10 |
| HIST1H2BI | -1.4011  | 6.89E-10 |
| HIST1H2BB | -1.44366 | 7.52E-10 |
| NFE2      | -4.58926 | 7.66E-10 |
| CCNH      | -1.1769  | 7.78E-10 |
| HCG4      | 1.388566 | 7.92E-10 |
| HIST1H3G  | -1.13887 | 8.28E-10 |
| CPEB1     | 1.414422 | 8.56E-10 |
| TMEM232   | 1.213679 | 8.62E-10 |
| GABRB1    | 1.067366 | 8.75E-10 |
| MMP8      | -1.86334 | 9.18E-10 |
| PPBP      | -3.93039 | 9.46E-10 |
| AZU1      | -5.70556 | 1.03E-09 |
| NOTCH3    | 1.060857 | 1.05E-09 |
| PLAC8     | -2.77137 | 1.05E-09 |
| LAMB3     | 1.280259 | 1.08E-09 |
| RAB27A    | -1.11546 | 1.10E-09 |
| KANK4     | 1.553466 | 1.11E-09 |
| SCN4B     | 1.683727 | 1.16E-09 |
| FASLG     | 1.680784 | 1.20E-09 |
| RGS9      | 1.620285 | 1.24E-09 |
| DEFA8P    | -3.82011 | 1.25E-09 |
| ELANE     | -5.38711 | 1.26E-09 |
| CXCL14    | 2.15314  | 1.33E-09 |
| SP7       | 1.200553 | 1.37E-09 |
| MXRA5     | 1.480191 | 1.44E-09 |
| FGFR3     | 2.019387 | 1.46E-09 |
| MYOM3     | 1.740843 | 1.50E-09 |
| CCDC80    | 1.010888 | 1.51E-09 |
| SLC9A3R2  | 1.161048 | 1.53E-09 |
| SLC36A4   | -1.09315 | 1.55E-09 |
| MPP1      | -1.09278 | 1.55E-09 |
| MYOM2     | 1.344907 | 1.65E-09 |
| MAPK14    | -1.01572 | 1.65E-09 |
| PCDHB2    | 1.097313 | 1.67E-09 |
| IFIT1     | 2.065058 | 1.67E-09 |

|              |          |          |
|--------------|----------|----------|
| INSC         | 2.017011 | 1.68E-09 |
| GPR160       | -1.63935 | 1.68E-09 |
| LOC400456    | 1.111159 | 1.69E-09 |
| PF4V1        | -4.08452 | 1.71E-09 |
| COL13A1      | 1.871792 | 1.71E-09 |
| SLCO1C1      | 1.925286 | 1.75E-09 |
| HOXC8        | 1.142293 | 1.76E-09 |
| HSF2BP       | 1.300117 | 1.78E-09 |
| FAM167A      | 1.255874 | 1.79E-09 |
| LOC100506731 | 1.092427 | 1.81E-09 |
| LOC100507055 | 1.437581 | 1.81E-09 |
| CROCCP3      | 1.65841  | 1.82E-09 |
| RASSF9       | 2.3733   | 1.89E-09 |
| FAM81A       | 1.259083 | 1.92E-09 |
| TRIL         | 1.429067 | 1.92E-09 |
| RGS7BP       | 1.799758 | 1.98E-09 |
| CLEC4D       | -2.21676 | 2.08E-09 |
| AADAT        | 1.127333 | 2.09E-09 |
| DEFA4        | -6.19574 | 2.10E-09 |
| PLIN2        | -2.60276 | 2.16E-09 |
| BTBD8        | 1.466291 | 2.19E-09 |
| FLJ46875     | 1.10407  | 2.26E-09 |
| TRIM45       | 1.352557 | 2.29E-09 |
| SERTAD4      | 1.14715  | 2.31E-09 |
| RUNX2        | 1.022018 | 2.32E-09 |
| PF4          | -4.20017 | 2.35E-09 |
| ANXA8L2      | 1.464022 | 2.39E-09 |
| LOC641467    | 1.733405 | 2.39E-09 |
| HIST1H2BG    | -1.55644 | 2.52E-09 |
| MDGA1        | 1.041512 | 2.57E-09 |
| LOC84989     | 1.139897 | 2.70E-09 |
| COL8A1       | 1.715188 | 2.77E-09 |
| HMGA1        | -1.48595 | 2.78E-09 |
| LOC728061    | 1.451347 | 2.79E-09 |
| PDK1         | -1.26427 | 2.81E-09 |
| SLC11A1      | -1.78394 | 2.82E-09 |
| TCEA3        | 1.082604 | 2.83E-09 |
| MIR100HG     | 1.200257 | 2.89E-09 |
| IHH          | 2.111628 | 2.98E-09 |
| AJUBA        | 1.10619  | 3.03E-09 |
| GLRX5        | -1.21126 | 3.04E-09 |
| C10orf107    | 1.825791 | 3.06E-09 |
| TTC21A       | 1.024308 | 3.08E-09 |

|              |          |          |
|--------------|----------|----------|
| LOC100147773 | 1.099975 | 3.08E-09 |
| C2orf88      | -1.61919 | 3.10E-09 |
| IDH2         | -1.29202 | 3.10E-09 |
| MYO1G        | -1.44941 | 3.11E-09 |
| ZNF846       | 1.629035 | 3.19E-09 |
| ANTXR1       | 1.093883 | 3.25E-09 |
| HIST1H2BM    | -1.3522  | 3.29E-09 |
| C14orf37     | 1.173439 | 3.62E-09 |
| COL8A2       | 1.40202  | 3.62E-09 |
| ACOX2        | 1.086378 | 3.65E-09 |
| KCNQ1OT1     | 1.24456  | 3.71E-09 |
| COL15A1      | 1.633609 | 3.74E-09 |
| PCDHB17      | 1.514406 | 3.84E-09 |
| LOC100127909 | 1.335282 | 4.04E-09 |
| DKFZp547J222 | 1.379578 | 4.08E-09 |
| NAP1L3       | 1.592983 | 4.09E-09 |
| HIST2H2AA4   | -1.2279  | 4.10E-09 |
| C14orf82     | 2.059569 | 4.17E-09 |
| PER3         | 1.200249 | 4.19E-09 |
| BOC          | 1.102846 | 4.21E-09 |
| IRGM         | -1.85479 | 4.26E-09 |
| PIM1         | -1.30645 | 4.27E-09 |
| LOC644192    | 1.087772 | 4.33E-09 |
| THSD4        | 1.645915 | 4.39E-09 |
| CABP1        | 1.127955 | 4.39E-09 |
| GLT1D1       | -2.68126 | 4.53E-09 |
| HIST1H2BO    | -1.39948 | 4.54E-09 |
| NPNT         | 1.194386 | 4.62E-09 |
| OSTalpha     | -2.05284 | 4.77E-09 |
| MLIP         | 1.177549 | 4.78E-09 |
| CLEC3B       | 1.043689 | 4.88E-09 |
| C5orf62      | -1.93503 | 4.89E-09 |
| NTN5         | 1.131427 | 4.99E-09 |
| KIAA1407     | 1.175654 | 5.24E-09 |
| GPRC5C       | 1.117058 | 5.26E-09 |
| HSPG2        | 1.08883  | 5.40E-09 |
| ZNF334       | 1.03991  | 5.53E-09 |
| ZNF618       | 1.125737 | 5.54E-09 |
| PCDHA3       | 1.244861 | 5.54E-09 |
| ABCB4        | 1.813019 | 5.59E-09 |
| HIST1H2BL    | -1.29583 | 5.62E-09 |
| ABCG4        | 1.472674 | 5.65E-09 |
| CEACAM8      | -4.98339 | 5.83E-09 |

|              |          |          |
|--------------|----------|----------|
| CST7         | -3.44426 | 6.08E-09 |
| MMP16        | 1.836117 | 6.20E-09 |
| IL17RD       | 1.47792  | 6.21E-09 |
| PRG2         | -4.15113 | 6.24E-09 |
| HEG1         | 1.049262 | 6.27E-09 |
| LPIN3        | 1.019473 | 6.39E-09 |
| LOC338817    | 1.316419 | 6.61E-09 |
| NKX3-2       | 1.530092 | 6.70E-09 |
| SEMA3D       | 2.18977  | 6.70E-09 |
| KCNS3        | 1.480258 | 6.74E-09 |
| SPON2        | 1.012001 | 6.75E-09 |
| CNIH3        | 1.104269 | 6.87E-09 |
| DPPA4        | -2.55118 | 6.89E-09 |
| SLC4A3       | 1.287269 | 6.97E-09 |
| MXD1         | -1.37459 | 7.01E-09 |
| CYP39A1      | 1.114729 | 7.32E-09 |
| P2RY2        | -1.8016  | 7.41E-09 |
| REM1         | 1.111923 | 7.55E-09 |
| MGC23284     | 1.017896 | 7.65E-09 |
| SERPINB10    | -2.89719 | 8.01E-09 |
| TAS2R14      | 1.085054 | 8.39E-09 |
| COL14A1      | 1.270139 | 9.09E-09 |
| LILRA6       | -1.57387 | 9.31E-09 |
| SDK2         | 1.127978 | 9.34E-09 |
| HIST1H2BH    | -1.42723 | 9.46E-09 |
| FLRT2        | 1.094567 | 9.52E-09 |
| LOC100132057 | 1.096607 | 9.71E-09 |
| CXCR1        | -1.50581 | 9.93E-09 |
| HMGB3P1      | -1.69883 | 1.00E-08 |
| PTX3         | -2.97267 | 1.02E-08 |
| BFSP1        | 1.575572 | 1.11E-08 |
| ZFP14        | 1.011628 | 1.12E-08 |
| LOC643650    | 1.598623 | 1.12E-08 |
| LGR6         | 1.066284 | 1.14E-08 |
| SLC36A2      | 2.542038 | 1.14E-08 |
| HIST1H2BJ    | -1.60273 | 1.15E-08 |
| EFHC1        | 1.140736 | 1.15E-08 |
| RGL4         | -3.9308  | 1.16E-08 |
| C14orf28     | 1.058809 | 1.17E-08 |
| TP73-AS1     | 1.212722 | 1.18E-08 |
| MURC         | 1.13662  | 1.18E-08 |
| LOC728978    | 1.283781 | 1.20E-08 |
| SCARA3       | 1.165987 | 1.21E-08 |



|              |          |          |
|--------------|----------|----------|
| IL2RB        | 1.332041 | 1.28E-08 |
| RGN          | 1.239807 | 1.30E-08 |
| DEFA3        | -6.36093 | 1.35E-08 |
| UACA         | 1.285115 | 1.35E-08 |
| FGFR2        | 1.168246 | 1.36E-08 |
| BLID         | 1.253517 | 1.49E-08 |
| RETN         | -3.94046 | 1.51E-08 |
| SLC25A5      | -1.06839 | 1.53E-08 |
| CDA          | -1.5455  | 1.54E-08 |
| SLC2A1       | -1.12093 | 1.54E-08 |
| FAM65B       | -1.23594 | 1.60E-08 |
| CA1          | -4.48294 | 1.61E-08 |
| GPR84        | -1.24377 | 1.63E-08 |
| HTR2A        | 1.426941 | 1.72E-08 |
| SNPH         | 1.026943 | 1.74E-08 |
| LRRC17       | 2.265884 | 1.79E-08 |
| RPL23AP32    | 1.64534  | 1.79E-08 |
| BEX1         | -2.06536 | 1.83E-08 |
| PRKCDBP      | 1.180327 | 1.83E-08 |
| RASL12       | 1.359352 | 1.85E-08 |
| SIGLEC5      | -1.10926 | 1.88E-08 |
| CLIC3        | 1.416007 | 1.90E-08 |
| LSP1         | 1.352427 | 2.06E-08 |
| HERC6        | 1.821304 | 2.10E-08 |
| CAPS         | 1.078179 | 2.11E-08 |
| CCDC42       | 1.465805 | 2.14E-08 |
| ZCWPW2       | 1.00481  | 2.15E-08 |
| IL22RA1      | 1.14169  | 2.18E-08 |
| ULK2         | 1.015825 | 2.26E-08 |
| PRTG         | 1.564431 | 2.27E-08 |
| ZNF469       | 1.426752 | 2.29E-08 |
| PNMAL1       | 2.540596 | 2.33E-08 |
| SPATA18      | 1.058205 | 2.35E-08 |
| LOC100130876 | 1.216463 | 2.43E-08 |
| CR1          | -1.38138 | 2.44E-08 |
| CEP164       | 1.021585 | 2.47E-08 |
| HIST1H2BK    | -1.0151  | 2.48E-08 |
| KLK3         | 1.433036 | 2.51E-08 |
| IL7          | 1.17119  | 2.54E-08 |
| PRSS57       | -4.75674 | 2.58E-08 |
| ADM          | -2.57866 | 2.58E-08 |
| LTBP3        | 1.449436 | 2.60E-08 |
| GYPA         | -2.44631 | 2.73E-08 |

|              |          |          |
|--------------|----------|----------|
| ANKRD50      | 1.1625   | 2.81E-08 |
| MTFP1        | -1.56924 | 2.88E-08 |
| MAP2         | 1.143592 | 2.91E-08 |
| LOC728743    | 1.049931 | 2.99E-08 |
| CAPS2        | 1.326243 | 2.99E-08 |
| PADI4        | -4.03941 | 2.99E-08 |
| LOC100130463 | 1.166969 | 3.00E-08 |
| IFIT2        | 1.572236 | 3.23E-08 |
| PROM1        | -1.49444 | 3.24E-08 |
| SMURF2       | 1.042015 | 3.27E-08 |
| STXBP2       | -1.19738 | 3.33E-08 |
| KLKP1        | 1.611543 | 3.34E-08 |
| RFTN2        | 1.287543 | 3.36E-08 |
| PANK1        | 1.174632 | 3.47E-08 |
| PGAM2        | 1.095288 | 3.52E-08 |
| TGM2         | -1.4755  | 3.56E-08 |
| HIST1H2BD    | -1.51103 | 3.56E-08 |
| UCK2         | -1.25471 | 3.60E-08 |
| HMBS         | -2.07974 | 3.62E-08 |
| PURG         | 1.170259 | 3.63E-08 |
| CSF3R        | -1.88627 | 3.68E-08 |
| TMEM169      | 1.157964 | 3.68E-08 |
| EMID1        | 1.417911 | 3.75E-08 |
| PCDHB6       | 1.512184 | 3.77E-08 |
| BTN3A1       | 1.425876 | 3.85E-08 |
| CD177        | -1.69521 | 3.85E-08 |
| RPL22L1      | -1.2577  | 3.91E-08 |
| CA2          | -2.52749 | 3.92E-08 |
| SLC7A1       | -1.25273 | 4.02E-08 |
| PGLYRP1      | -3.94104 | 4.07E-08 |
| STAR         | -2.05642 | 4.12E-08 |
| OR51E1       | 1.522746 | 4.20E-08 |
| ZYX          | -1.02864 | 4.24E-08 |
| NOP16        | -1.36882 | 4.41E-08 |
| ITGBL1       | 1.291785 | 4.42E-08 |
| LOC441204    | 1.722878 | 4.42E-08 |
| VSTM1        | -3.53639 | 4.43E-08 |
| SEMA3B       | 1.122995 | 4.45E-08 |
| CLGN         | -1.42906 | 4.64E-08 |
| SNCA         | -2.1174  | 4.72E-08 |
| MGAM         | -1.88059 | 4.80E-08 |
| LCN2         | -5.45957 | 4.82E-08 |
| CNTN1        | 1.38683  | 4.87E-08 |

|              |          |          |
|--------------|----------|----------|
| DPT          | 1.519645 | 4.90E-08 |
| HIST1H2AK    | -1.47788 | 4.92E-08 |
| MXI1         | -1.02446 | 5.02E-08 |
| CXCL11       | 1.957934 | 5.09E-08 |
| CROCC        | 1.069133 | 5.25E-08 |
| GLIS2        | 1.245115 | 5.32E-08 |
| PDCD1LG2     | 1.083995 | 5.34E-08 |
| LOC728431    | 1.236642 | 5.50E-08 |
| SGCD         | 1.670804 | 5.51E-08 |
| CEACAM3      | -3.11612 | 5.53E-08 |
| MIRLET7BHG   | 1.262935 | 5.57E-08 |
| RYR1         | 1.355105 | 5.64E-08 |
| MS4A3        | -3.52275 | 5.71E-08 |
| STGC3        | 1.218807 | 5.83E-08 |
| FAM66C       | 1.123984 | 5.91E-08 |
| KIAA0408     | 1.038565 | 5.95E-08 |
| PLEKHH2      | 1.101542 | 6.10E-08 |
| C1orf220     | 1.74811  | 6.12E-08 |
| ZNF114       | 1.386571 | 6.14E-08 |
| C14orf132    | 1.250258 | 6.19E-08 |
| ZFP37        | 1.104234 | 6.27E-08 |
| HIST1H1C     | -1.34875 | 6.36E-08 |
| ZNF528       | 1.210894 | 6.54E-08 |
| TRAF1        | 1.240684 | 6.65E-08 |
| BLM          | -1.18147 | 6.75E-08 |
| C6orf97      | 1.091273 | 6.91E-08 |
| LOC100506247 | 1.318899 | 7.06E-08 |
| LOC646976    | -1.65542 | 7.20E-08 |
| RIPPLY2      | 1.493228 | 7.37E-08 |
| BMP8A        | 1.224408 | 7.57E-08 |
| ITGA3        | 1.043527 | 7.57E-08 |
| FLJ22447     | 1.052419 | 7.61E-08 |
| SHOX2        | 1.281467 | 7.68E-08 |
| BPI          | -3.7833  | 7.78E-08 |
| FEN1         | -1.48177 | 7.89E-08 |
| GPR137C      | 1.275615 | 8.07E-08 |
| TNFRSF10C    | -1.18075 | 8.07E-08 |
| ENAH         | 1.048667 | 8.59E-08 |
| AREG         | -3.06467 | 8.75E-08 |
| ORM2         | -1.31979 | 8.82E-08 |
| CACNA1E      | 1.593198 | 8.93E-08 |
| MEGF10       | 1.845824 | 9.06E-08 |
| CORO2A       | -1.42723 | 9.07E-08 |

|              |          |          |
|--------------|----------|----------|
| LOC100306975 | 1.109821 | 9.39E-08 |
| SLC19A2      | -1.21231 | 9.42E-08 |
| RAN          | -1.14447 | 9.71E-08 |
| RTKN         | 1.174859 | 9.81E-08 |
| C19orf38     | -1.22349 | 1.01E-07 |
| KLHL3        | 1.096805 | 1.02E-07 |
| MCTP2        | -1.45256 | 1.02E-07 |
| SLC27A2      | -1.55495 | 1.04E-07 |
| LINC00472    | 1.242808 | 1.06E-07 |
| PTH2R        | -1.95178 | 1.07E-07 |
| ENO1         | -1.22561 | 1.08E-07 |
| DEPDC7       | 1.150638 | 1.10E-07 |
| JMJD6        | -1.13856 | 1.10E-07 |
| CCDC102B     | 1.587372 | 1.14E-07 |
| HAL          | -2.16875 | 1.16E-07 |
| ADH4         | -2.02409 | 1.18E-07 |
| CGNL1        | 1.059852 | 1.20E-07 |
| STOM         | -1.31428 | 1.20E-07 |
| SYT12        | 1.095003 | 1.23E-07 |
| PLK2         | 1.017199 | 1.24E-07 |
| EDA2R        | 1.082902 | 1.25E-07 |
| VASH1        | 1.057916 | 1.28E-07 |
| LOC100216546 | 1.294495 | 1.30E-07 |
| LOC100616668 | 1.484686 | 1.35E-07 |
| DGKI         | 1.723959 | 1.35E-07 |
| AGRN         | 1.120687 | 1.35E-07 |
| PRSS45       | 1.272831 | 1.37E-07 |
| FAM134B      | -1.65498 | 1.37E-07 |
| WDR52        | 1.028218 | 1.41E-07 |
| HPCA         | 1.113103 | 1.41E-07 |
| LOC100128420 | 1.750952 | 1.45E-07 |
| CLC          | -4.4814  | 1.50E-07 |
| MUSTN1       | 1.288217 | 1.52E-07 |
| CBR3         | 1.11944  | 1.58E-07 |
| ALOX12       | -2.50224 | 1.59E-07 |
| C1orf204     | 1.624059 | 1.62E-07 |
| GLT8D2       | 1.450476 | 1.63E-07 |
| COL22A1      | 2.312434 | 1.67E-07 |
| C20orf3      | -1.35652 | 1.68E-07 |
| MTMR11       | 1.143154 | 1.68E-07 |
| C19orf77     | -2.48786 | 1.69E-07 |
| ZNF540       | 1.161492 | 1.69E-07 |
| GEMIN8P4     | -1.37001 | 1.71E-07 |

|           |          |          |
|-----------|----------|----------|
| SYT7      | 1.021237 | 1.76E-07 |
| MDFI      | 1.068621 | 1.79E-07 |
| SLC4A1    | -2.26415 | 1.82E-07 |
| HIST1H2AJ | -1.39987 | 1.84E-07 |
| C18orf54  | 1.308168 | 1.96E-07 |
| LOC646324 | 1.69606  | 1.97E-07 |
| ZNF541    | 1.054409 | 2.01E-07 |
| PDE11A    | 2.080436 | 2.01E-07 |
| FERMT3    | -1.0443  | 2.09E-07 |
| SLC44A3   | 1.624072 | 2.12E-07 |
| HEMK1     | 1.396213 | 2.14E-07 |
| XAF1      | 1.410511 | 2.15E-07 |
| ADORA3    | -1.44719 | 2.15E-07 |
| ARSE      | 1.193947 | 2.16E-07 |
| SFRP4     | 1.332512 | 2.17E-07 |
| SLC26A8   | -2.70672 | 2.17E-07 |
| TRH       | -1.63347 | 2.21E-07 |
| COL21A1   | 1.075621 | 2.22E-07 |
| ISM1      | 1.475852 | 2.23E-07 |
| CD163     | -1.73777 | 2.25E-07 |
| AHNAK2    | 1.462445 | 2.25E-07 |
| SLC16A8   | 1.212001 | 2.27E-07 |
| LAPTM5    | -1.09603 | 2.27E-07 |
| DDX21     | -1.64642 | 2.31E-07 |
| LOC645195 | -1.07033 | 2.33E-07 |
| AGPAT9    | -1.14657 | 2.38E-07 |
| EMX2OS    | 2.561183 | 2.39E-07 |
| PYROXD2   | 1.017238 | 2.42E-07 |
| TSPY26P   | 1.231644 | 2.49E-07 |
| CALCR     | 1.364298 | 2.50E-07 |
| TRO       | 1.070709 | 2.53E-07 |
| TNFRSF25  | 1.150057 | 2.54E-07 |
| TMEM98    | 1.062474 | 2.58E-07 |
| CYP4F3    | -3.71184 | 2.64E-07 |
| WNT5A     | 1.703504 | 2.64E-07 |
| CFI       | 1.100332 | 2.65E-07 |
| UPP1      | -1.0989  | 2.66E-07 |
| TUBB1     | -2.69781 | 2.68E-07 |
| CORO1A    | -1.36621 | 2.80E-07 |
| MYO1H     | 1.486442 | 2.85E-07 |
| COL2A1    | 4.188583 | 2.88E-07 |
| EDARADD   | -1.15243 | 2.91E-07 |
| SALL1     | 1.317797 | 2.98E-07 |

|              |          |          |
|--------------|----------|----------|
| THAP2        | 1.076953 | 2.99E-07 |
| DBP          | 1.305812 | 3.03E-07 |
| RFESD        | -1.56158 | 3.04E-07 |
| C9orf129     | 1.432382 | 3.05E-07 |
| B3GALT2      | 1.939847 | 3.12E-07 |
| LIMS2        | 1.127522 | 3.13E-07 |
| TRANK1       | 1.025265 | 3.45E-07 |
| NRXN3        | 1.172247 | 3.49E-07 |
| AHRR         | 1.323505 | 3.49E-07 |
| SLCO4A1      | -2.01952 | 3.52E-07 |
| SLC22A16     | -2.68564 | 3.55E-07 |
| CD38         | -1.89573 | 3.58E-07 |
| LOC100509860 | 1.76407  | 3.62E-07 |
| ITGB4        | 1.003937 | 3.64E-07 |
| SMCR5        | 1.049308 | 3.64E-07 |
| TMEM154      | -1.61995 | 3.69E-07 |
| ATP6V1B1     | 1.051467 | 3.70E-07 |
| LNX1         | 1.084512 | 3.79E-07 |
| SEMA6D       | 1.088929 | 3.83E-07 |
| EIF4EBP1     | -1.13109 | 3.84E-07 |
| CEACAM6      | -2.58875 | 3.87E-07 |
| BTN3A2       | 1.002388 | 3.87E-07 |
| CEBPE        | -3.61392 | 3.88E-07 |
| LOC145694    | 1.304658 | 3.91E-07 |
| DEPDC1       | -1.23815 | 3.97E-07 |
| GLIPR2       | -1.13557 | 3.98E-07 |
| ALAS2        | -3.53013 | 3.99E-07 |
| PAEP         | 1.04066  | 4.05E-07 |
| C1QTNF8      | 2.126725 | 4.08E-07 |
| RAB26        | 1.110977 | 4.09E-07 |
| MAB21L1      | 1.069655 | 4.12E-07 |
| LOC100192378 | 1.114384 | 4.15E-07 |
| C1orf135     | -1.51296 | 4.17E-07 |
| DAGLA        | 1.125425 | 4.19E-07 |
| PLA2G10      | 1.070329 | 4.25E-07 |
| ALOX15B      | -1.59516 | 4.31E-07 |
| PODNL1       | 1.191218 | 4.48E-07 |
| HIST1H2AE    | -1.47901 | 4.55E-07 |
| GFI1         | -1.30447 | 4.58E-07 |
| LIPC         | 1.50364  | 4.71E-07 |
| KCNJ12       | 1.177148 | 4.79E-07 |
| HPRT1        | -1.10986 | 4.91E-07 |
| FAR2         | -1.28808 | 4.92E-07 |

|           |          |          |
|-----------|----------|----------|
| C14orf64  | 1.54746  | 5.05E-07 |
| C3orf67   | 1.325401 | 5.09E-07 |
| PHC2      | -1.1604  | 5.11E-07 |
| ERO1L     | -1.12429 | 5.14E-07 |
| ZFAND5    | -1.38083 | 5.22E-07 |
| RTP4      | 1.442481 | 5.23E-07 |
| EBF3      | 1.124504 | 5.23E-07 |
| HS3ST1    | 1.07314  | 5.26E-07 |
| TESC      | -1.82881 | 5.29E-07 |
| TSPAN11   | 1.031389 | 5.32E-07 |
| CLEC18B   | 1.59688  | 5.40E-07 |
| ZG16B     | -1.23067 | 5.44E-07 |
| UBE2S     | -1.13591 | 5.68E-07 |
| CNTNAP2   | 2.540872 | 5.70E-07 |
| HHIPL1    | 1.23256  | 5.80E-07 |
| BGN       | 1.326934 | 5.88E-07 |
| PTN       | 1.591176 | 5.91E-07 |
| HSPA4L    | -1.24972 | 6.03E-07 |
| HIST1H2AH | -1.41549 | 6.09E-07 |
| GCLC      | -1.14554 | 6.30E-07 |
| CADM1     | 1.159633 | 6.30E-07 |
| CRYGS     | 1.019208 | 6.38E-07 |
| SNORA33   | -1.1088  | 6.39E-07 |
| ZNF683    | 1.417621 | 6.40E-07 |
| CFP       | -1.65745 | 6.77E-07 |
| OXTR      | 1.613425 | 6.80E-07 |
| RHAG      | -3.93341 | 6.95E-07 |
| NR2E3     | 1.09906  | 7.06E-07 |
| PEX2      | 1.218166 | 7.13E-07 |
| DMGDH     | 1.069467 | 7.13E-07 |
| SLC2A14   | -1.7574  | 7.19E-07 |
| SLIT3     | 1.592459 | 7.22E-07 |
| CCDC148   | 1.203296 | 7.39E-07 |
| PCDHGC3   | 1.108651 | 7.47E-07 |
| ENPP1     | 1.036421 | 7.51E-07 |
| THY1      | 2.381846 | 7.57E-07 |
| HES5      | 1.4213   | 7.68E-07 |
| HIST1H2BC | -1.29822 | 8.06E-07 |
| LILRA2    | -1.09321 | 8.16E-07 |
| LRRC66    | 1.087876 | 8.16E-07 |
| RGS2      | -1.32931 | 8.22E-07 |
| SLC26A10  | 1.289045 | 8.32E-07 |
| FCN2      | -1.77996 | 8.33E-07 |

|               |          |          |
|---------------|----------|----------|
| RAB44         | -2.64795 | 8.45E-07 |
| MGAT3         | -1.2321  | 8.68E-07 |
| PZP           | 1.065391 | 9.05E-07 |
| CSF2RA        | -1.04423 | 9.25E-07 |
| PIWIL4        | -1.01623 | 9.40E-07 |
| UBQLNL        | 1.205378 | 9.42E-07 |
| DKFZp686M1136 | 1.111038 | 9.43E-07 |
| AMT           | 1.042597 | 9.50E-07 |
| ANGPTL5       | 1.44861  | 9.76E-07 |
| SHISA2        | 1.39565  | 9.76E-07 |
| ABCB1         | 1.098457 | 9.81E-07 |
| HPR           | -2.91392 | 1.01E-06 |
| ABCB10        | -1.37189 | 1.02E-06 |
| ANKRD65       | 1.004638 | 1.03E-06 |
| CDC7          | -1.10751 | 1.07E-06 |
| C20orf108     | -1.07847 | 1.09E-06 |
| SATB2         | 1.159886 | 1.11E-06 |
| GPR20         | 1.241296 | 1.11E-06 |
| FLJ46906      | 1.118283 | 1.12E-06 |
| LOC100132495  | 1.263237 | 1.12E-06 |
| ADIPOR2       | -1.03186 | 1.14E-06 |
| SLC22A15      | -1.17204 | 1.15E-06 |
| MYH6          | 1.115125 | 1.15E-06 |
| SLC8A3        | 2.407021 | 1.16E-06 |
| NCKAP5        | 1.32629  | 1.18E-06 |
| GATA1         | -2.71052 | 1.18E-06 |
| C6orf195      | 1.137533 | 1.18E-06 |
| TMEM200B      | 1.132934 | 1.22E-06 |
| SCARA5        | 1.344078 | 1.29E-06 |
| NBPF1         | 1.088912 | 1.29E-06 |
| DLX3          | 1.225449 | 1.30E-06 |
| SIX4          | 1.037366 | 1.31E-06 |
| CD5L          | -2.48187 | 1.32E-06 |
| SDF2L1        | -1.02563 | 1.32E-06 |
| C16orf47      | 1.069768 | 1.35E-06 |
| PEG3          | 1.041535 | 1.36E-06 |
| LINC00256A    | 1.192097 | 1.37E-06 |
| P2RX7         | 1.14286  | 1.38E-06 |
| CTSG          | -4.35163 | 1.39E-06 |
| MYO1B         | 1.092359 | 1.43E-06 |
| PGF           | 1.172189 | 1.44E-06 |
| HILS1         | 1.155513 | 1.45E-06 |
| NOV           | 1.134032 | 1.47E-06 |



|              |          |          |
|--------------|----------|----------|
| PRAM1        | -2.35825 | 1.47E-06 |
| AHCY         | -1.15582 | 1.49E-06 |
| LRRC3B       | 1.472797 | 1.50E-06 |
| EPX          | -3.43293 | 1.51E-06 |
| GDF10        | 1.581995 | 1.53E-06 |
| SLC25A21     | -1.55812 | 1.54E-06 |
| SHC4         | 1.329047 | 1.55E-06 |
| COLEC12      | 1.229145 | 1.56E-06 |
| TEX21P       | 1.018588 | 1.58E-06 |
| VNN2         | -1.75416 | 1.63E-06 |
| GSTA7P       | -1.88685 | 1.63E-06 |
| LOC440905    | 1.224412 | 1.64E-06 |
| CA8          | -1.07977 | 1.65E-06 |
| BST1         | -1.45055 | 1.68E-06 |
| LOC283867    | 1.913022 | 1.69E-06 |
| MAGED4B      | 1.601557 | 1.70E-06 |
| XK           | -2.7435  | 1.70E-06 |
| C13orf33     | -1.58183 | 1.72E-06 |
| NAMPT        | -1.80877 | 1.73E-06 |
| SLC28A3      | -1.86139 | 1.73E-06 |
| KIAA1107     | 1.314515 | 1.73E-06 |
| LY6G6F       | -1.76733 | 1.74E-06 |
| C1orf98      | 1.237322 | 1.77E-06 |
| DLX1         | 1.049397 | 1.77E-06 |
| LOC100130373 | 1.130557 | 1.81E-06 |
| LRRC15       | 2.047202 | 1.83E-06 |
| NCAM1        | 1.229177 | 1.85E-06 |
| KLHDC9       | 1.110067 | 1.86E-06 |
| C10orf10     | -1.99188 | 1.88E-06 |
| LOC643623    | 1.465435 | 1.92E-06 |
| LOC100131929 | 1.300245 | 1.92E-06 |
| AHSP         | -3.89449 | 1.96E-06 |
| SAMD9L       | 1.341081 | 1.97E-06 |
| MNDA         | -1.82913 | 1.97E-06 |
| SLC25A39     | -1.27453 | 1.97E-06 |
| AOX2P        | -1.62148 | 1.98E-06 |
| OAS3         | 1.213272 | 1.98E-06 |
| C6orf165     | 1.189659 | 1.99E-06 |
| MRC2         | 1.255866 | 2.00E-06 |
| ZNF827       | 1.138033 | 2.01E-06 |
| NNMT         | -1.59159 | 2.06E-06 |
| LCP1         | -1.06788 | 2.07E-06 |
| SALL4        | 1.274854 | 2.09E-06 |

|              |          |          |
|--------------|----------|----------|
| MGC4294      | 2.224554 | 2.10E-06 |
| LDHA         | -1.46329 | 2.18E-06 |
| KAZALD1      | 2.178558 | 2.19E-06 |
| PTPN20A      | 1.534512 | 2.20E-06 |
| RPS6KA6      | 1.034114 | 2.26E-06 |
| GPX8         | 1.315506 | 2.26E-06 |
| TP63         | 1.7356   | 2.29E-06 |
| GMPR         | -1.59942 | 2.34E-06 |
| PDE4B        | -1.32281 | 2.40E-06 |
| HEMGN        | -3.15769 | 2.41E-06 |
| SMPD3        | 3.036259 | 2.44E-06 |
| GABRB2       | 1.868533 | 2.52E-06 |
| NOX5         | 2.436175 | 2.52E-06 |
| SEMA5A       | 1.114413 | 2.59E-06 |
| HOXA3        | 1.104657 | 2.62E-06 |
| OR2G6        | -1.64974 | 2.62E-06 |
| E2F8         | -2.95846 | 2.64E-06 |
| CDKN2D       | -1.02186 | 2.65E-06 |
| TPPP3        | 1.682572 | 2.66E-06 |
| ITPRIP       | -1.02996 | 2.67E-06 |
| COL6A1       | 1.295362 | 2.67E-06 |
| LOC375295    | 1.321754 | 2.69E-06 |
| GPAT2        | -1.11581 | 2.69E-06 |
| MT1A         | -1.39149 | 2.70E-06 |
| LOC100652763 | 1.629615 | 2.90E-06 |
| E2F4         | -1.22355 | 2.92E-06 |
| DOK7         | 1.20601  | 2.93E-06 |
| SHROOM3      | 1.101573 | 2.94E-06 |
| SLC16A10     | -2.00625 | 3.01E-06 |
| BCL11A       | -1.18955 | 3.03E-06 |
| ZNF214       | 1.010703 | 3.09E-06 |
| LOC728147    | 1.010606 | 3.11E-06 |
| HLA-DPB2     | 1.242711 | 3.12E-06 |
| CASC1        | 1.158908 | 3.12E-06 |
| C7orf40      | -1.09046 | 3.18E-06 |
| ZCCHC5       | 1.334732 | 3.24E-06 |
| CCNA1        | -1.16579 | 3.26E-06 |
| LINC00310    | 1.486916 | 3.29E-06 |
| HIST1H1D     | -1.49839 | 3.32E-06 |
| PRDX2        | -1.1758  | 3.35E-06 |
| EGR3         | 1.27807  | 3.47E-06 |
| C3orf32      | 1.022315 | 3.50E-06 |
| LTF          | -3.51646 | 3.54E-06 |

|              |          |          |
|--------------|----------|----------|
| TFRC         | -1.40227 | 3.66E-06 |
| LRRC10B      | -1.34928 | 3.68E-06 |
| APCDD1L      | 3.297178 | 3.68E-06 |
| SIX1         | 1.026267 | 3.73E-06 |
| HK3          | -1.78574 | 3.74E-06 |
| ANKH         | 1.041097 | 3.76E-06 |
| ZNF674       | 1.165634 | 3.85E-06 |
| BHLHE22      | 1.800806 | 3.85E-06 |
| EMB          | -1.35131 | 3.86E-06 |
| FAP          | 2.255993 | 3.90E-06 |
| SLC1A3       | -1.29815 | 3.93E-06 |
| HIST1H4F     | -1.40494 | 3.94E-06 |
| IFIT1B       | -3.55236 | 3.97E-06 |
| FLJ38109     | 1.113161 | 3.99E-06 |
| FLJ34503     | 1.691847 | 4.09E-06 |
| RBM38        | -1.80503 | 4.10E-06 |
| CHMP4C       | 1.194335 | 4.11E-06 |
| LOC284080    | 1.065808 | 4.13E-06 |
| FAM13C       | 1.454985 | 4.15E-06 |
| MYB          | -1.90916 | 4.19E-06 |
| LOC401164    | 1.539654 | 4.36E-06 |
| COL6A2       | 1.024405 | 4.38E-06 |
| IFIT3        | 1.376867 | 4.45E-06 |
| LMO1         | 1.059755 | 4.47E-06 |
| PCMTD1       | 1.114822 | 4.49E-06 |
| CDKN3        | -1.95843 | 4.51E-06 |
| TMTC2        | 1.05362  | 4.68E-06 |
| ATP1B3       | -1.12933 | 4.94E-06 |
| GPX3         | -2.26589 | 5.25E-06 |
| PKD1L1       | 1.873261 | 5.26E-06 |
| DKFZp761E198 | -1.32926 | 5.30E-06 |
| ENPP6        | 1.396161 | 5.34E-06 |
| NCOA7        | -1.02877 | 5.39E-06 |
| HIST1H3H     | -1.7444  | 5.39E-06 |
| DCXR         | -1.03903 | 5.43E-06 |
| TREML1       | -1.61285 | 5.44E-06 |
| ENTPD3       | 1.977623 | 5.51E-06 |
| NMNAT2       | 1.342105 | 5.54E-06 |
| RSPO2        | 2.499893 | 5.57E-06 |
| NRK          | 1.537098 | 5.62E-06 |
| ENHO         | 1.336493 | 5.80E-06 |
| C3orf45      | 1.024066 | 5.82E-06 |
| AVPR2        | 1.151702 | 5.87E-06 |

|              |          |          |
|--------------|----------|----------|
| C1orf150     | -1.14062 | 6.00E-06 |
| LOC100130428 | 1.152564 | 6.13E-06 |
| IL21R        | 1.137622 | 6.16E-06 |
| RUNDC3B      | 1.019437 | 6.32E-06 |
| BGLAP        | 2.25246  | 6.34E-06 |
| ADAMTS6      | 1.179979 | 6.44E-06 |
| SPOCK1       | 1.382136 | 6.55E-06 |
| LOC100130009 | -1.37377 | 6.58E-06 |
| FAT1         | 1.238633 | 6.69E-06 |
| GAPDH        | -1.03097 | 6.77E-06 |
| DDIT4        | -1.59296 | 6.79E-06 |
| HP           | -2.83647 | 6.86E-06 |
| PYGL         | -1.05979 | 6.93E-06 |
| FAM135B      | 1.103481 | 7.00E-06 |
| FLJ21408     | 1.10072  | 7.07E-06 |
| PDE3A        | 1.321525 | 7.19E-06 |
| OPCML        | 2.451953 | 7.22E-06 |
| LOC219347    | 1.046694 | 7.32E-06 |
| ANXA3        | -2.61775 | 7.37E-06 |
| RGS17        | 1.123309 | 7.39E-06 |
| HIST1H3D     | -1.53092 | 7.42E-06 |
| PFKFB3       | -1.14302 | 7.43E-06 |
| PPP2R3B-AS1  | 1.15051  | 7.45E-06 |
| TNFRSF11A    | 1.081022 | 7.45E-06 |
| PTPN7        | -1.36017 | 7.51E-06 |
| LGALS12      | -1.84369 | 7.52E-06 |
| PRSS21       | -1.03773 | 7.59E-06 |
| COL10A1      | 2.048449 | 7.65E-06 |
| SLPI         | -1.40036 | 7.69E-06 |
| TRIM66       | 1.091536 | 7.75E-06 |
| ADRA2C       | 1.111132 | 7.76E-06 |
| LILRA5       | -1.25515 | 7.80E-06 |
| TMEM130      | 1.344228 | 7.82E-06 |
| ANO5         | 2.09102  | 7.87E-06 |
| ALS2CR11     | 1.419838 | 7.88E-06 |
| CD79B        | -1.03186 | 8.00E-06 |
| TBX3         | 1.119477 | 8.31E-06 |
| COL3A1       | 2.772374 | 8.33E-06 |
| OLAH         | -1.01956 | 8.46E-06 |
| OLFM4        | -3.53689 | 8.59E-06 |
| RASL10B      | -1.14553 | 8.87E-06 |
| YOD1         | -1.16811 | 8.87E-06 |
| COL16A1      | 1.233677 | 8.89E-06 |

|              |          |          |
|--------------|----------|----------|
| GXYLT2       | 1.750043 | 8.90E-06 |
| ITGA2B       | -1.01483 | 9.01E-06 |
| LOC283174    | 1.46036  | 9.03E-06 |
| LOC100506898 | 1.05888  | 9.07E-06 |
| CRTAM        | 1.344996 | 9.14E-06 |
| LOC100509091 | 1.760173 | 9.15E-06 |
| SLC6A1       | 1.589223 | 9.35E-06 |
| ZNF474       | 1.11267  | 9.36E-06 |
| DNTT         | -2.90471 | 9.38E-06 |
| LOC100506123 | 1.09706  | 9.67E-06 |
| FZD1         | 1.123588 | 9.78E-06 |
| MATN4        | 2.714391 | 9.87E-06 |
| DUSP21       | -1.3374  | 9.93E-06 |
| ZFP28        | 1.095605 | 1.02E-05 |
| LOC284219    | 1.189569 | 1.04E-05 |
| HIST1H1E     | -1.40803 | 1.04E-05 |
| STXBP6       | 1.151367 | 1.07E-05 |
| HBQ1         | -2.51078 | 1.10E-05 |
| LCAT         | 1.064129 | 1.10E-05 |
| C10orf105    | 2.232658 | 1.10E-05 |
| EPB42        | -2.87878 | 1.12E-05 |
| NS3BP        | 1.043443 | 1.13E-05 |
| C15orf52     | 1.090119 | 1.15E-05 |
| ARL4C        | -1.15833 | 1.18E-05 |
| TRGV7        | 1.014202 | 1.19E-05 |
| RHBDL3       | 1.019626 | 1.22E-05 |
| HBG1         | -3.23017 | 1.22E-05 |
| CBLN4        | 1.178078 | 1.23E-05 |
| PDE6H        | -1.56157 | 1.27E-05 |
| IFI44L       | 1.557962 | 1.31E-05 |
| ABCC13       | -1.12096 | 1.33E-05 |
| LOC100128501 | 1.072563 | 1.33E-05 |
| RHBDL2       | 1.97117  | 1.34E-05 |
| F2RL3        | -1.80083 | 1.36E-05 |
| S1PR4        | -1.86537 | 1.37E-05 |
| TCTEX1D1     | -1.28454 | 1.37E-05 |
| C1QTNF3      | 1.396217 | 1.38E-05 |
| PRKG2        | 1.075078 | 1.39E-05 |
| NAALAD2      | 1.231917 | 1.40E-05 |
| PMF1-BGLAP   | 2.199087 | 1.40E-05 |
| ATP2C2       | -1.63794 | 1.41E-05 |
| SSC5D        | 1.615725 | 1.42E-05 |
| PPA1         | -1.19031 | 1.43E-05 |

|              |          |          |
|--------------|----------|----------|
| CENPV        | -1.04543 | 1.44E-05 |
| KBTBD11      | -1.32452 | 1.45E-05 |
| LOC338799    | 1.008923 | 1.45E-05 |
| MFSD2A       | -1.27253 | 1.45E-05 |
| ITPK1-AS1    | 1.11196  | 1.47E-05 |
| MTHFD2       | -1.29483 | 1.47E-05 |
| DPY19L2      | 1.388362 | 1.60E-05 |
| C12orf75     | 1.152016 | 1.63E-05 |
| RELN         | 1.315742 | 1.66E-05 |
| PLAT         | 1.186003 | 1.68E-05 |
| PLN          | 1.22784  | 1.70E-05 |
| CHST6        | 1.023188 | 1.70E-05 |
| ZSCAN23      | 1.234274 | 1.73E-05 |
| FASN         | -1.72138 | 1.73E-05 |
| MT1B         | -1.3495  | 1.75E-05 |
| GATA2        | 1.069268 | 1.75E-05 |
| COL5A1       | 1.35414  | 1.78E-05 |
| GATA6        | 1.302403 | 1.79E-05 |
| MAP3K8       | -1.0621  | 1.80E-05 |
| NTNG1        | 1.093166 | 1.80E-05 |
| PSD3         | 1.082819 | 1.80E-05 |
| MT1L         | -1.35836 | 1.81E-05 |
| CSTA         | -1.66808 | 1.82E-05 |
| LAMP3        | 1.151463 | 1.83E-05 |
| SLC26A4      | 1.432177 | 1.90E-05 |
| HN1          | -1.09916 | 1.94E-05 |
| COL12A1      | 1.311841 | 1.96E-05 |
| SUSD2        | 1.026364 | 1.97E-05 |
| CR1L         | -2.2147  | 1.98E-05 |
| FKBP5        | -1.74098 | 2.00E-05 |
| IFI44        | 1.079251 | 2.01E-05 |
| C5orf13      | 1.075455 | 2.05E-05 |
| LOC340335    | 1.164465 | 2.11E-05 |
| COL24A1      | 1.661824 | 2.18E-05 |
| TMOD1        | -1.67243 | 2.19E-05 |
| LOC285300    | 1.134576 | 2.21E-05 |
| CBLN2        | 1.893605 | 2.23E-05 |
| MEOX1        | 1.261546 | 2.24E-05 |
| LUM          | 1.655392 | 2.24E-05 |
| LOC100131032 | 1.080986 | 2.27E-05 |
| DHRS3        | -1.23857 | 2.27E-05 |
| LOC100506191 | 1.135396 | 2.29E-05 |
| PDGFD        | 1.186519 | 2.30E-05 |

|              |          |          |
|--------------|----------|----------|
| FNDC1        | 2.248689 | 2.30E-05 |
| HAPLN1       | 2.069107 | 2.33E-05 |
| ALDH1A2      | 1.356448 | 2.45E-05 |
| MKRN9P       | 1.605564 | 2.51E-05 |
| LOC100127885 | 1.153713 | 2.53E-05 |
| MT1X         | -1.61224 | 2.54E-05 |
| ANO3         | 1.257544 | 2.57E-05 |
| GPR68        | 1.209497 | 2.59E-05 |
| LOC100507410 | 1.234068 | 2.63E-05 |
| XCL1         | 1.104191 | 2.63E-05 |
| KBTBD10      | 1.408524 | 2.65E-05 |
| MT1M         | -1.39787 | 2.66E-05 |
| RERGL        | 1.600315 | 2.67E-05 |
| TNNT3        | 2.084794 | 2.69E-05 |
| C9           | -1.31727 | 2.69E-05 |
| CPXM2        | 1.022602 | 2.72E-05 |
| FOLH1B       | 1.534779 | 2.74E-05 |
| FN1          | 1.711188 | 2.75E-05 |
| ARVCF        | 1.002311 | 2.78E-05 |
| HIST1H2AL    | -2.41587 | 2.85E-05 |
| OLIG1        | -1.11571 | 2.86E-05 |
| BATF         | -1.00494 | 2.92E-05 |
| MMRN1        | -1.82848 | 2.94E-05 |
| DAZ1         | 1.473964 | 2.99E-05 |
| ATF7         | 1.028792 | 2.99E-05 |
| ORC1         | -1.35434 | 3.02E-05 |
| GYS2         | -1.50641 | 3.06E-05 |
| NBPF15       | 1.061919 | 3.06E-05 |
| APCDD1       | 1.118696 | 3.15E-05 |
| LOC730091    | 1.088955 | 3.18E-05 |
| PAMR1        | 1.635041 | 3.19E-05 |
| PTPRZ1       | 1.51065  | 3.21E-05 |
| LOC728073    | 1.199936 | 3.32E-05 |
| SLC1A5       | -1.16535 | 3.33E-05 |
| CPE          | 1.103855 | 3.34E-05 |
| LYPD1        | 1.073807 | 3.34E-05 |
| SYTL2        | 1.197777 | 3.35E-05 |
| CYP4Z2P      | 1.096873 | 3.40E-05 |
| PCDHGB6      | 1.253835 | 3.42E-05 |
| GP9          | -1.32584 | 3.45E-05 |
| HTRA1        | 1.334674 | 3.52E-05 |
| LOC730101    | 1.186824 | 3.56E-05 |
| ARHGEF25     | 1.027236 | 3.59E-05 |

|              |          |          |
|--------------|----------|----------|
| COL5A2       | 1.728676 | 3.67E-05 |
| KLF1         | -1.99405 | 3.71E-05 |
| ROPN1        | 1.323207 | 3.72E-05 |
| PDZK1IP1     | -1.61148 | 3.77E-05 |
| CDON         | 1.038441 | 3.78E-05 |
| CHAD         | 1.74429  | 3.80E-05 |
| LOC100506127 | 1.099238 | 3.83E-05 |
| C1QTNF6      | 1.154984 | 3.86E-05 |
| FCN1         | -1.95835 | 3.86E-05 |
| IL25         | 1.044396 | 3.90E-05 |
| NOG          | 1.28173  | 3.95E-05 |
| COL1A1       | 2.212412 | 3.97E-05 |
| CRISPLD1     | 1.435661 | 3.98E-05 |
| DNAJC6       | -1.00275 | 4.00E-05 |
| CDH13        | 1.277398 | 4.00E-05 |
| GBP1P1       | 1.1611   | 4.08E-05 |
| IRS2         | -1.60393 | 4.15E-05 |
| PAR6G        | 1.104921 | 4.16E-05 |
| SPDYE8P      | 1.117768 | 4.17E-05 |
| RIMBP3       | 1.378706 | 4.22E-05 |
| SRGAP3       | 1.470877 | 4.29E-05 |
| L1TD1        | 1.258672 | 4.34E-05 |
| LOC100128226 | 1.357305 | 4.38E-05 |
| MT2A         | -1.27172 | 4.40E-05 |
| BASP1        | -1.60834 | 4.44E-05 |
| HCST         | -1.16404 | 4.50E-05 |
| LOC100129322 | -1.5967  | 4.57E-05 |
| PAR5         | 1.303357 | 4.64E-05 |
| BSN          | 1.058482 | 4.75E-05 |
| NCF4         | -1.04275 | 4.85E-05 |
| LOC100130778 | 1.199679 | 4.94E-05 |
| WISP2        | 1.384335 | 4.95E-05 |
| E2F2         | -2.56408 | 4.95E-05 |
| MT1E         | -1.2476  | 5.13E-05 |
| MEIS2        | 1.175692 | 5.13E-05 |
| CCNE2        | -1.15178 | 5.16E-05 |
| IL5RA        | -1.30957 | 5.29E-05 |
| LOC100133286 | -1.10937 | 5.39E-05 |
| APOBEC3B     | -1.00066 | 5.44E-05 |
| ADAMTS4      | -1.80853 | 5.48E-05 |
| TRIM58       | -2.24322 | 5.53E-05 |
| PKMYT1       | -1.12265 | 5.55E-05 |
| CD1C         | 1.117343 | 5.56E-05 |



|              |          |          |
|--------------|----------|----------|
| ODZ2         | 1.099666 | 5.58E-05 |
| SULF1        | 1.179452 | 5.63E-05 |
| AURKA        | -1.49763 | 5.65E-05 |
| PDK4         | -1.23806 | 5.72E-05 |
| GZMH         | 1.403803 | 5.72E-05 |
| ANGPTL4      | -1.69568 | 5.73E-05 |
| PRUNE2       | 1.078652 | 5.73E-05 |
| HIST2H3A     | -2.79292 | 5.89E-05 |
| OSBP2        | -1.70439 | 5.90E-05 |
| ARSI         | 1.480875 | 5.97E-05 |
| PDGFRL       | 1.498861 | 6.07E-05 |
| CLEC5A       | -1.93454 | 6.15E-05 |
| COPZ2        | 1.199257 | 6.19E-05 |
| CLDN1        | 1.606532 | 6.21E-05 |
| HBB          | -1.40743 | 6.38E-05 |
| LOC100505806 | 1.169658 | 6.41E-05 |
| PRG3         | -2.50349 | 6.43E-05 |
| LOC100506328 | -1.46746 | 6.48E-05 |
| LOC441052    | -1.4073  | 6.57E-05 |
| GVINP1       | 1.164706 | 6.61E-05 |
| AGPAT2       | -1.22783 | 6.76E-05 |
| SMOC2        | 1.486565 | 6.78E-05 |
| IER2         | 1.391604 | 6.85E-05 |
| SFRP2        | 1.35152  | 7.00E-05 |
| KIT          | 1.148868 | 7.09E-05 |
| P4HA3        | 1.052129 | 7.14E-05 |
| LOC283728    | 1.031559 | 7.24E-05 |
| TOX3         | 1.645439 | 7.36E-05 |
| FGG          | -1.79193 | 7.44E-05 |
| EMX2         | 1.139713 | 7.51E-05 |
| PCOLCE       | 1.325855 | 7.57E-05 |
| LOC100506514 | 1.008838 | 7.60E-05 |
| TECRL        | 1.012566 | 7.79E-05 |
| IL4          | -1.07543 | 7.84E-05 |
| MMP23B       | 1.746693 | 7.84E-05 |
| LPAR4        | 1.81304  | 7.90E-05 |
| IMPA2        | -1.10717 | 7.91E-05 |
| HIST1H4A     | -1.0155  | 8.04E-05 |
| DKK3         | 1.451392 | 8.08E-05 |
| SHROOM2      | 1.153071 | 8.09E-05 |
| PSORS1C1     | 1.135027 | 8.10E-05 |
| C1orf228     | -1.61455 | 8.13E-05 |
| BSPRY        | -1.99974 | 8.20E-05 |

|              |          |          |
|--------------|----------|----------|
| KAL1         | 1.326057 | 8.27E-05 |
| GPR158       | 1.420573 | 8.40E-05 |
| OTOR         | -1.10858 | 8.49E-05 |
| SDC4         | -1.02653 | 8.60E-05 |
| CXCL9        | 1.346581 | 8.97E-05 |
| LOC100128001 | 1.065581 | 9.26E-05 |
| C2orf48      | -1.99963 | 9.32E-05 |
| ADAMTSL2     | 1.250124 | 9.41E-05 |
| FCRL6        | 1.137799 | 9.43E-05 |
| OGN          | 2.777599 | 9.61E-05 |
| HIST1H2AM    | -1.46407 | 9.63E-05 |
| VWC2         | 2.078611 | 9.71E-05 |
| HIST1H2BF    | -1.81841 | 9.77E-05 |
| HIST1H2BE    | -1.12281 | 0.000101 |
| PTCRA        | -1.59955 | 0.000102 |
| HIST1H3F     | -1.58981 | 0.000102 |
| COL1A2       | 1.830481 | 0.000102 |
| HBD          | -2.63391 | 0.000102 |
| CEACAM4      | -1.08361 | 0.000103 |
| C1orf195     | 1.020988 | 0.000103 |
| GYPB         | -2.39917 | 0.000103 |
| EFHB         | 1.107554 | 0.000106 |
| KCNS1        | 1.379769 | 0.000106 |
| ASPN         | 2.601888 | 0.00011  |
| GP6          | -1.69514 | 0.000111 |
| SPINK8       | -1.05061 | 0.000114 |
| FLT3         | -1.05571 | 0.000116 |
| TAS2R20      | 1.62877  | 0.000118 |
| LOC100128727 | 1.185951 | 0.00012  |
| FNDC5        | 1.232901 | 0.000123 |
| HIST1H4K     | -1.06309 | 0.000124 |
| HIST2H4B     | -1.21845 | 0.000124 |
| ACPP         | -1.1326  | 0.000124 |
| CDH2         | 1.469392 | 0.000124 |
| COL7A1       | 1.182687 | 0.000127 |
| C17orf99     | -2.8473  | 0.000128 |
| HBM          | -3.39584 | 0.000129 |
| ADAM20       | 1.14459  | 0.000131 |
| REEP1        | 1.004467 | 0.000132 |
| CAMP         | -4.22563 | 0.000134 |
| SHC3         | 1.336421 | 0.000134 |
| MYH7B        | 1.000593 | 0.000134 |
| CYB5A        | -1.12969 | 0.000134 |

|              |          |          |
|--------------|----------|----------|
| GHR          | -1.22751 | 0.000134 |
| TMEM119      | 1.961674 | 0.000134 |
| NMUR1        | 1.147619 | 0.000136 |
| PPP1R14C     | 1.452123 | 0.000138 |
| THBS1        | -1.0842  | 0.000138 |
| GALNTL2      | -1.52763 | 0.000139 |
| CLEC11A      | 1.268596 | 0.00014  |
| STMN2        | 4.305145 | 0.000142 |
| CYP27C1      | 1.375095 | 0.000144 |
| ITGA2        | 1.427968 | 0.000146 |
| P2RY6        | 1.013472 | 0.000147 |
| NKG7         | -1.71964 | 0.000148 |
| SOX11        | 2.194028 | 0.00015  |
| PENK         | 1.692715 | 0.000151 |
| SOX18        | 1.020309 | 0.000151 |
| ALPK2        | 1.684403 | 0.000153 |
| CLEC3A       | 2.830551 | 0.000155 |
| PCDHAC2      | 1.208831 | 0.000157 |
| ALB          | -1.83275 | 0.000158 |
| SGMS2        | 1.653906 | 0.000162 |
| LOC100130232 | 1.107217 | 0.000163 |
| ISG15        | 1.351457 | 0.000165 |
| SGCG         | 1.075493 | 0.000168 |
| ZDHHC8P1     | 1.178476 | 0.000168 |
| DPP4         | 1.414627 | 0.000168 |
| IGLL1        | -1.57747 | 0.000172 |
| EGFL6        | 2.217743 | 0.000174 |
| FAM55B       | 1.085153 | 0.000174 |
| ABCA13       | -2.486   | 0.000175 |
| COL11A1      | 2.154686 | 0.000175 |
| CRTAC1       | 1.895598 | 0.000178 |
| WNT1         | 1.164785 | 0.000179 |
| FCER1A       | 1.5897   | 0.000181 |
| NRBP2        | 1.060376 | 0.000182 |
| SAA1         | -2.97801 | 0.000183 |
| HILPDA       | -1.36053 | 0.000183 |
| HIST1H4I     | -1.19885 | 0.000187 |
| B4GALNT4     | 1.15953  | 0.000192 |
| ACSL1        | -1.40473 | 0.000193 |
| HOMER2       | 1.508088 | 0.000197 |
| EGFLAM       | -1.11432 | 0.000198 |
| DIRC3        | 1.488148 | 0.000203 |
| LINC00313    | -1.84514 | 0.000203 |

|              |          |          |
|--------------|----------|----------|
| PRSS35       | 2.293558 | 0.000208 |
| CYP8B1       | -1.31218 | 0.000213 |
| ADD2         | -1.99916 | 0.000213 |
| ANKRD18A     | -1.23876 | 0.000215 |
| SPARC        | 1.274464 | 0.000217 |
| MMP11        | 1.447743 | 0.000218 |
| C6orf174     | 1.066529 | 0.000222 |
| ANK1         | -1.86543 | 0.000224 |
| PRC1         | -1.11907 | 0.000225 |
| HIST1H4H     | -1.3111  | 0.000229 |
| AVPR1A       | 1.097609 | 0.000231 |
| LOC100130992 | 1.09102  | 0.000232 |
| KRT19P2      | 1.229159 | 0.000234 |
| LOC100129408 | 1.067833 | 0.000242 |
| CDH1         | -1.79903 | 0.000245 |
| MAL          | -1.05012 | 0.000249 |
| OMD          | 1.390004 | 0.000252 |
| HLA-DMB      | 1.024531 | 0.000254 |
| IRX6         | 1.177973 | 0.000263 |
| RHD          | -1.8992  | 0.000265 |
| MMP2         | 1.104861 | 0.000268 |
| ACAP1        | -1.20511 | 0.000269 |
| SERPINE2     | 1.098454 | 0.000269 |
| ARHGAP8      | -1.19918 | 0.000269 |
| TIMP4        | -1.92523 | 0.00027  |
| GFI1B        | -1.66121 | 0.00027  |
| LOC100505648 | 1.130709 | 0.000281 |
| CRIM1        | 1.011114 | 0.000285 |
| C1orf61      | 1.183646 | 0.00029  |
| HMCN1        | 1.252502 | 0.000295 |
| NLRP12       | -1.36565 | 0.000301 |
| AURKB        | -1.27526 | 0.000307 |
| LALBA        | -1.93312 | 0.000307 |
| SLITRK5      | -1.15635 | 0.000308 |
| TM7SF4       | 1.477086 | 0.000308 |
| IGFBP3       | -1.31934 | 0.000315 |
| TTR          | -1.39682 | 0.000319 |
| MN1          | 1.086889 | 0.000325 |
| CCL20        | -1.21775 | 0.000326 |
| FCGR3A       | -1.01215 | 0.00033  |
| A2ML1        | -1.15289 | 0.000342 |
| FAM155A      | 1.204034 | 0.000345 |
| TRIM10       | -1.2846  | 0.000351 |

|              |          |          |
|--------------|----------|----------|
| BTC          | 1.616855 | 0.000361 |
| KEL          | -2.432   | 0.000367 |
| GPR183       | -1.0961  | 0.000369 |
| AMTN         | 1.838722 | 0.000371 |
| TPBG         | 1.088    | 0.000378 |
| UAP1         | -1.07885 | 0.000382 |
| LOC642781    | 1.041695 | 0.000386 |
| NUF2         | -1.42344 | 0.000404 |
| F3           | -1.03728 | 0.000408 |
| INS-IGF2     | 1.452943 | 0.000412 |
| CYP4F12      | 1.233838 | 0.000422 |
| PPP1R27      | -1.50624 | 0.000422 |
| CERCAM       | 1.043331 | 0.000431 |
| CRISPLD2     | -1.20205 | 0.000433 |
| MGP          | 1.064121 | 0.000437 |
| GNG4         | 1.483861 | 0.000438 |
| HIST1H2AI    | -2.35915 | 0.00044  |
| GRIA2        | 1.032681 | 0.000442 |
| HIST1H4D     | -1.33285 | 0.000445 |
| TGFB3        | 1.237008 | 0.000453 |
| REP15        | 2.039652 | 0.000462 |
| TMEM156      | -1.31603 | 0.000477 |
| LOC283484    | 1.33663  | 0.000477 |
| EAF2         | -1.00824 | 0.000478 |
| SP6          | 1.057639 | 0.000482 |
| COL17A1      | -2.42226 | 0.000486 |
| ICAM4        | -1.19777 | 0.000492 |
| HTR1F        | 1.08916  | 0.000495 |
| SPAG5        | -1.202   | 0.000515 |
| EDIL3        | 1.147964 | 0.000523 |
| CXCL10       | 1.736846 | 0.000528 |
| AZGP1        | -1.21009 | 0.00053  |
| ACSL6        | -2.32584 | 0.000537 |
| PII5         | -1.40949 | 0.000538 |
| LOC283710    | -1.39973 | 0.000542 |
| CDCA8        | -1.17023 | 0.000543 |
| CFB          | 1.026678 | 0.000559 |
| DKFZp451A211 | -1.4118  | 0.000561 |
| POU2AF1      | -1.66189 | 0.000561 |
| PRG4         | 2.287916 | 0.000566 |
| ZIC2         | -1.09376 | 0.000567 |
| CMTM2        | -1.7297  | 0.000587 |
| PRPH2        | 1.006053 | 0.000604 |

|              |          |          |
|--------------|----------|----------|
| PTTG2        | -1.12221 | 0.000616 |
| DAPL1        | 1.389665 | 0.000617 |
| SERPINB2     | -1.15879 | 0.000626 |
| UGT3A2       | -1.07838 | 0.000636 |
| VSIG4        | -1.0153  | 0.000649 |
| TTY16        | -1.40673 | 0.000668 |
| CKAP2L       | -1.31913 | 0.000669 |
| RNU2-2       | -1.89121 | 0.00067  |
| HBA2         | -2.331   | 0.000675 |
| LOC401497    | -1.03675 | 0.000676 |
| NTN1         | 1.161534 | 0.000679 |
| APOD         | -1.85857 | 0.000691 |
| UCN2         | 1.130159 | 0.000704 |
| RGS1         | -1.64115 | 0.000713 |
| C2orf27B     | 1.051078 | 0.000729 |
| PCDHGB8P     | 1.138956 | 0.00073  |
| SLC2A3       | -1.37566 | 0.000738 |
| VPREB1       | -2.56985 | 0.000774 |
| LRRC4        | 1.293969 | 0.000781 |
| C2orf80      | -1.1569  | 0.000781 |
| LBP          | -1.48079 | 0.000784 |
| LOC284630    | 1.114927 | 0.000792 |
| FAM47C       | 1.077844 | 0.000794 |
| LOC100129617 | -1.05761 | 0.000825 |
| LINC00261    | 1.430394 | 0.000827 |
| LOC152225    | 1.106242 | 0.000834 |
| LRRC19       | 1.148538 | 0.000836 |
| THBS4        | 1.906792 | 0.000851 |
| SEMA3E       | 1.080739 | 0.000853 |
| FUT4         | -1.06466 | 0.00086  |
| KIF2C        | -1.26436 | 0.000861 |
| HIST1H3B     | -1.90768 | 0.000866 |
| BMP5         | 1.010646 | 0.000866 |
| LPAR3        | 1.177157 | 0.000872 |
| KCNV1        | -1.32208 | 0.000888 |
| RPGRIP1      | 1.192557 | 0.000892 |
| SLAMF9       | 1.157673 | 0.000897 |
| KLHL30       | 1.254454 | 0.000953 |
| LRRC8E       | 1.345775 | 0.001008 |
| FAM9C        | -1.07188 | 0.001013 |
| HIST1H4E     | -1.34454 | 0.001033 |
| TMEM229A     | 1.021364 | 0.001038 |
| RSAD2        | 1.060161 | 0.001042 |

|              |          |          |
|--------------|----------|----------|
| COMP         | 1.859916 | 0.00107  |
| AEBP1        | 1.035684 | 0.001096 |
| PNMT         | -1.20123 | 0.001097 |
| RGS18        | -1.06603 | 0.001104 |
| PIM2         | -1.01125 | 0.001168 |
| SYT13        | 1.430903 | 0.001188 |
| FAM159B      | 1.9399   | 0.001188 |
| GLDC         | 1.049642 | 0.001208 |
| BIN2         | -1.02013 | 0.001226 |
| MAFF         | -1.13081 | 0.001229 |
| EPB49        | -1.36399 | 0.001229 |
| GAP43        | 1.403325 | 0.001247 |
| RFPL2        | -1.12256 | 0.001266 |
| LGALS2       | 1.323101 | 0.001302 |
| FAM46C       | -1.44504 | 0.001317 |
| ZNF702P      | 1.221009 | 0.001321 |
| LINC00242    | 1.123271 | 0.001323 |
| LOC402160    | 1.006845 | 0.001324 |
| C3orf80      | 1.010547 | 0.001348 |
| TEF          | 1.402235 | 0.001351 |
| NDST4        | 1.302058 | 0.001373 |
| CTHRC1       | 1.614832 | 0.001391 |
| GUCY1A2      | 1.043813 | 0.001399 |
| AKAP6        | 1.140488 | 0.001509 |
| NEURL3       | 1.213253 | 0.001519 |
| MMP9         | 1.388285 | 0.001533 |
| NOXO1        | 1.018793 | 0.001539 |
| FOXG1        | 1.09167  | 0.001547 |
| BLNK         | 1.145233 | 0.001562 |
| LOC100134256 | -1.23878 | 0.001575 |
| GLDN         | -1.09377 | 0.001582 |
| OR4X1        | -1.05012 | 0.001594 |
| KCNK2        | 1.545475 | 0.001609 |
| CLEC4GP1     | 1.510629 | 0.00168  |
| LHX2         | 1.326842 | 0.001704 |
| DNASE2B      | 1.476859 | 0.001723 |
| ASXL3        | 1.257892 | 0.001732 |
| RNU1-5       | -1.25764 | 0.001777 |
| MYOM1        | 1.33986  | 0.00178  |
| PRKAR2B      | -1.45359 | 0.001807 |
| GADD45B      | -1.35699 | 0.001834 |
| LOC339505    | -1.28721 | 0.001837 |
| LYVE1        | -1.45701 | 0.001865 |

|              |          |          |
|--------------|----------|----------|
| NMU          | -1.02229 | 0.001868 |
| LOC100130627 | 1.159003 | 0.001873 |
| OR52E2       | -1.26173 | 0.001915 |
| KCNH2        | -1.40814 | 0.001918 |
| SPRY1        | -1.00472 | 0.001935 |
| MYH1         | 1.712392 | 0.001936 |
| PNPLA1       | -1.0724  | 0.002038 |
| PRRX1        | 1.048897 | 0.002077 |
| LDLRAD2      | 1.256715 | 0.002094 |
| SUSD5        | 1.103446 | 0.002143 |
| IFITM5       | 1.80698  | 0.002143 |
| TNF          | 1.255264 | 0.002169 |
| MMP26        | 1.013678 | 0.002199 |
| EIF1AY       | -1.65164 | 0.0022   |
| DEFA6        | -1.01364 | 0.002201 |
| NUP210       | -1.04575 | 0.002217 |
| PLAC1L       | -1.1693  | 0.002231 |
| PDPN         | 1.00474  | 0.002239 |
| CLEC4G       | -1.05146 | 0.002259 |
| CRLF1        | 1.91943  | 0.00226  |
| LINC00116    | 1.215238 | 0.00236  |
| ELOVL7       | -1.02689 | 0.002399 |
| GAL3ST3      | -1.01937 | 0.002409 |
| MKI67        | -1.0985  | 0.002474 |
| CPZ          | 1.859539 | 0.002478 |
| ZNF806       | 1.05869  | 0.002491 |
| DIRAS1       | 1.167167 | 0.002502 |
| SEC1         | 1.329333 | 0.002564 |
| PKP2         | -1.89703 | 0.002606 |
| ERAP2        | 1.576942 | 0.002613 |
| CCR3         | -1.09224 | 0.002653 |
| KDELR3       | 1.258637 | 0.00266  |
| QRFPR        | 1.644335 | 0.002731 |
| FMOD         | 1.045878 | 0.002783 |
| IL11         | 2.266248 | 0.002814 |
| HIST1H1A     | 1.312379 | 0.002829 |
| MMP7         | 1.455265 | 0.002855 |
| SLED1        | -1.52712 | 0.002915 |
| RHCE         | -2.22527 | 0.002959 |
| SHCBP1L      | 1.048058 | 0.003033 |
| SPTA1        | -2.42191 | 0.003033 |
| COL4A5       | 1.023837 | 0.003106 |
| LOC100131347 | 1.035883 | 0.003108 |



|           |          |          |
|-----------|----------|----------|
| BAMBI     | 1.021656 | 0.003193 |
| GPR141    | -1.08436 | 0.003203 |
| CXCR2     | -1.02767 | 0.003212 |
| ECM1      | 1.330945 | 0.003289 |
| PPMIH     | 1.240844 | 0.003342 |
| MEST      | -1.36733 | 0.003453 |
| CCL8      | 2.237854 | 0.00346  |
| SEC14L4   | -1.10022 | 0.003478 |
| LOC340017 | -1.11722 | 0.003487 |
| SLC2A4    | -1.58373 | 0.003494 |
| DACH2     | 1.02696  | 0.003541 |
| KRT1      | -1.12565 | 0.003605 |
| C21orf37  | 1.686569 | 0.003606 |
| AMBP      | -1.40788 | 0.003629 |
| MMP1      | 1.953398 | 0.003682 |
| C18orf56  | -1.4404  | 0.003741 |
| JAKMIP2   | 1.036228 | 0.003795 |
| HMMR      | -1.25201 | 0.003795 |
| SAA2      | -1.40818 | 0.003834 |
| LPPR3     | -1.20375 | 0.003852 |
| HIST1H1B  | -1.92017 | 0.003858 |
| PRR23A    | -1.24172 | 0.003888 |
| SLCO4C1   | -1.29962 | 0.003934 |
| MGC16025  | -1.0167  | 0.003954 |
| EGR2      | 1.458558 | 0.003989 |
| TNNC2     | 1.060777 | 0.00404  |
| DIO2      | 1.373935 | 0.004076 |
| PTTG1     | -1.2134  | 0.004102 |
| CD83      | 1.012027 | 0.004104 |
| SKA1      | -1.51148 | 0.004141 |
| PCDHAC1   | 1.092241 | 0.004193 |
| C9orf84   | -1.12125 | 0.0042   |
| CCDC164   | -1.22691 | 0.004252 |
| LOC284108 | 1.225876 | 0.004315 |
| LOC285629 | 1.390519 | 0.004317 |
| FAM70A    | 1.588252 | 0.004385 |
| IL1RL1    | -1.13541 | 0.004392 |
| SOX3      | 1.422932 | 0.004408 |
| APOBEC3A  | -1.78859 | 0.004483 |
| HHIPL2    | 1.337819 | 0.004495 |
| LOC283731 | 1.819581 | 0.004495 |
| ACP5      | 1.181457 | 0.004514 |
| TMEM132E  | 1.251754 | 0.004542 |

|              |          |          |
|--------------|----------|----------|
| ADAMTS1      | -1.19597 | 0.004632 |
| SELL         | -1.09868 | 0.004639 |
| UBE2C        | -1.22236 | 0.004656 |
| BRIP1        | -1.24004 | 0.004821 |
| LOC399708    | -1.01202 | 0.004885 |
| CISH         | -1.25589 | 0.005026 |
| STC2         | 1.178513 | 0.005062 |
| C4orf6       | 1.49829  | 0.005084 |
| AKR1B15      | 1.107212 | 0.005176 |
| C9orf53      | 1.416495 | 0.005404 |
| SYN2         | -1.16286 | 0.005463 |
| LINC00304    | -1.09127 | 0.005605 |
| NHLH1        | -1.0332  | 0.005753 |
| TSPAN16      | -1.14968 | 0.005862 |
| CRABP1       | 1.326333 | 0.00591  |
| SELE         | 1.683346 | 0.006151 |
| SPC24        | -1.11884 | 0.006178 |
| FGF10        | 1.307478 | 0.006358 |
| GAS1         | -1.05652 | 0.006394 |
| GSTT1        | -2.3966  | 0.006436 |
| PITX2        | 1.201337 | 0.006449 |
| ADH1C        | -1.69745 | 0.006475 |
| GTSE1        | -1.06019 | 0.006497 |
| IL8          | -1.28839 | 0.006544 |
| DBX1         | 1.022988 | 0.006704 |
| HIST1H4L     | -1.0858  | 0.006719 |
| KCTD4        | 1.221306 | 0.006816 |
| KIF15        | -1.08878 | 0.006914 |
| UNC13A       | 1.022417 | 0.006962 |
| PKIB         | 1.171644 | 0.00717  |
| STAP1        | -1.00134 | 0.007536 |
| PPEF1        | 1.377311 | 0.007618 |
| IGLL5        | -1.61707 | 0.0077   |
| VSNL1        | 1.351095 | 0.00771  |
| DLGAP5       | -1.57275 | 0.007769 |
| SLC38A11     | 1.031166 | 0.007825 |
| ITLN1        | -1.33779 | 0.007825 |
| C6orf138     | 1.627383 | 0.007969 |
| GABRP        | -1.17681 | 0.008246 |
| WNT2B        | 1.274764 | 0.008734 |
| LOC100271722 | 1.124672 | 0.008757 |
| SULT1B1      | -1.27986 | 0.008798 |
| CCNB2        | -1.37773 | 0.008811 |

|              |          |          |
|--------------|----------|----------|
| ADH1B        | -2.31927 | 0.008949 |
| OR52I2       | 1.109283 | 0.009625 |
| RGPD1        | -1.17027 | 0.009749 |
| MLC1         | -1.54065 | 0.009924 |
| ADH1A        | -1.86209 | 0.009927 |
| LOC100653210 | -1.39265 | 0.009972 |
| NT5DC4       | 1.51413  | 0.010026 |
| APOLD1       | -1.04112 | 0.010052 |
| TSPAN2       | 1.049898 | 0.010156 |
| MFAP4        | 1.124441 | 0.010592 |
| PGBD5        | 1.154285 | 0.010663 |
| FKBP10       | 1.039736 | 0.010746 |
| CIDEA        | -1.49551 | 0.011072 |
| PROM2        | 1.105754 | 0.011388 |
| MTL5         | -1.0274  | 0.011489 |
| CHI3L1       | -1.02606 | 0.011526 |
| GRP          | 1.15236  | 0.011607 |
| PDE8B        | -1.12416 | 0.011797 |
| PLIN5        | -1.07183 | 0.011919 |
| SCRG1        | 1.193085 | 0.011962 |
| TNFRSF13B    | -1.21599 | 0.012034 |
| P2RY14       | 1.257952 | 0.012106 |
| CDT1         | -1.32372 | 0.012132 |
| KIF18A       | -1.22429 | 0.012271 |
| FABP4        | -1.56417 | 0.012709 |
| PSORS1C3     | 1.376566 | 0.012744 |
| OIP5         | -1.03848 | 0.012856 |
| LOC400965    | 1.15813  | 0.012998 |
| HLA-DQA1     | 1.059287 | 0.013002 |
| C20orf123    | 1.053001 | 0.013354 |
| CD24         | -1.23838 | 0.0134   |
| PDE3B        | -1.10452 | 0.014298 |
| MGST1        | -1.51063 | 0.014777 |
| XIST         | 3.590785 | 0.015284 |
| TUBB3        | 1.320648 | 0.015385 |
| CADM2        | 1.113439 | 0.015685 |
| LINC00320    | 1.032351 | 0.016361 |
| LOC100287221 | 1.311328 | 0.017298 |
| COL6A3       | 1.382002 | 0.017375 |
| TNP1         | 1.027597 | 0.017392 |
| 1-Mar        | -1.01774 | 0.017757 |
| MYOC         | -1.15019 | 0.018023 |
| TMCC2        | -1.0832  | 0.018503 |

|            |          |          |
|------------|----------|----------|
| NDP        | 1.128384 | 0.018623 |
| SKA3       | -1.03709 | 0.018635 |
| MSMP       | 1.599243 | 0.01922  |
| LOC285965  | 1.085339 | 0.020068 |
| HOXB7      | 1.457772 | 0.020334 |
| CA4        | -1.30968 | 0.021511 |
| CENPA      | -1.54585 | 0.022363 |
| C13orf30   | 1.52705  | 0.02242  |
| TMEM196    | 1.247336 | 0.023211 |
| GDF6       | 1.372988 | 0.023427 |
| C19orf80   | -1.59745 | 0.023795 |
| LMO3       | 1.167814 | 0.024184 |
| HJURP      | -1.38236 | 0.024539 |
| ST6GAL2    | 1.167676 | 0.024697 |
| GPR182     | 1.495101 | 0.024734 |
| LEP        | -2.14239 | 0.024944 |
| KIAA0101   | -1.38889 | 0.025228 |
| FAM55D     | 1.096099 | 0.025485 |
| CILP       | 1.54319  | 0.026574 |
| BUB1       | -1.09883 | 0.026918 |
| DGAT2      | -1.54539 | 0.027075 |
| SBSN       | 1.228475 | 0.027442 |
| ADIPOQ     | -1.42757 | 0.028363 |
| NUSAP1     | -1.17275 | 0.029408 |
| UTY        | -1.68553 | 0.029908 |
| SLC13A5    | 1.236848 | 0.030132 |
| DDX3Y      | -2.15425 | 0.030233 |
| LOC401847  | -1.16785 | 0.030648 |
| CA12       | 1.229848 | 0.030938 |
| PTCHD3     | -1.07831 | 0.036963 |
| CDCA2      | -1.20486 | 0.038228 |
| EGR1       | 1.083105 | 0.039611 |
| ZCCHC13    | 1.238966 | 0.040804 |
| PLA2G2A    | 1.007313 | 0.04264  |
| RPS4Y1     | -3.02437 | 0.044681 |
| TK1        | -1.05811 | 0.044916 |
| NPY1R      | 1.131654 | 0.046292 |
| MAGEB6     | 1.676443 | 0.046954 |
| BIRC5      | -1.16756 | 0.047714 |
| GPR179     | 1.87466  | 0.048007 |
| TNN        | 1.112928 | 0.048666 |
| NCRNA00185 | -1.59174 | 0.049414 |
